# Supplementary material for: Ancestral dichlorodiphenyltrichloroethane (DDT) exposure promotes epigenetic transgenerational inheritance of obesity
Source: PubMed Central journal article supplement (PMC3853586; doi:10.1186/1741-7015-11-228), 2013-10-23
Supplement: 1741-7015-11-228-S1.pdf [file 1741-7015-11-228-S1.pdf]

**Supplemental Table S1A.**

Female rat body weight and organ weights in F1 and F3 generation female rats Control, DDT and Low Dose DDT lineages (mean  $\pm$  standard error).

| Generation | Treatment    | Sex | Body Weight (grams)   | Ovaries (% BW)         | Uterus (% BW)           | Kidney (% BW)             |
|------------|--------------|-----|-----------------------|------------------------|-------------------------|---------------------------|
| F1         | Control      | F   | 323.0<br>$\pm$ 6.67   | 0.0492<br>$\pm$ 0.0012 | 0.2832<br>$\pm$ 0.0191  | 0.3289<br>$\pm$ 0.0054    |
| F1         | DDT          | F   | 295.6**<br>$\pm$ 6.76 | 0.0541<br>$\pm$ 0.0027 | 0.3349<br>$\pm$ 0.0245  | 0.3499*<br>$\pm$ 0.0083   |
| F1         | Low Dose DDT | F   | 298.9**<br>$\pm$ 4.58 | 0.0528<br>$\pm$ 0.0023 | 0.3569*<br>$\pm$ 0.0299 | 0.3649***<br>$\pm$ 0.0053 |
| F3         | Control      | F   | 289.3<br>$\pm$ 5.01   | nd                     | nd                      | nd                        |
| F3         | DDT          | F   | 269.5**<br>$\pm$ 3.52 | nd                     | nd                      | nd                        |
| F3         | Low Dose DDT | F   | 287.4<br>$\pm$ 3.01   | nd                     | nd                      | nd                        |

**Supplemental Table S1B.**

Male rat body weight (grams) and organ weights (% of body weight) in F1 and F3 generation Control, DDT and Low Dose DDT (mean  $\pm$  standard error).

| Generation | Treatment    | Sex | Body Weight (grams)    | Testis (% BW)          | Prostate (% BW)        | Seminal Vesicle (% BW) | Epididymis (% BW)       | Kidney (% BW)            |
|------------|--------------|-----|------------------------|------------------------|------------------------|------------------------|-------------------------|--------------------------|
| F1         | Control      | M   | 567.2<br>$\pm$ 6.83    | 0.7799<br>$\pm$ 0.0127 | 0.1943<br>$\pm$ 0.0078 | 0.0835<br>$\pm$ 0.0020 | 0.2566<br>$\pm$ 0.0037  | 0.3415<br>$\pm$ 0.0077   |
| F1         | DDT          | M   | 518.3**<br>$\pm$ 12.84 | 0.7661<br>$\pm$ 0.0193 | 0.1894<br>$\pm$ 0.0083 | 0.0873<br>$\pm$ 0.0056 | 0.2529<br>$\pm$ 0.0072  | 0.3725*<br>$\pm$ 0.0120  |
| F1         | Low Dose DDT | M   | 546.6<br>$\pm$ 10.22   | 0.7781<br>$\pm$ 0.0127 | 0.1965<br>$\pm$ 0.0070 | 0.0851<br>$\pm$ 0.0025 | 0.2716*<br>$\pm$ 0.0047 | 0.3834**<br>$\pm$ 0.0107 |
| F3         | Control      | M   | 513.7<br>$\pm$ 8.79    | nd                     | nd                     | nd                     | nd                      | nd                       |
| F3         | DDT          | M   | 496.0<br>$\pm$ 7.39    | nd                     | nd                     | nd                     | nd                      | nd                       |
| F3         | Low dose DDT | M   | 522.2<br>$\pm$ 9.34    | nd                     | nd                     | nd                     | nd                      | nd                       |

Asterisks (\*, \*\*, \*\*\*), if present, indicate statistically significant differences between means of control and DDT or low dose DDT lineages (P<0.05, P<0.01 and P<0.001 respectively); the nd indicates not determined and tissue weights were only examined in the F1 generation to assess potential toxicity.
