# Supplementary material for: Ancestral dichlorodiphenyltrichloroethane (DDT) exposure promotes epigenetic transgenerational inheritance of obesity
Source: PubMed Central journal article supplement (PMC3853586; doi:10.1186/1741-7015-11-228), 2013-10-23

# Supplemental Figure S2

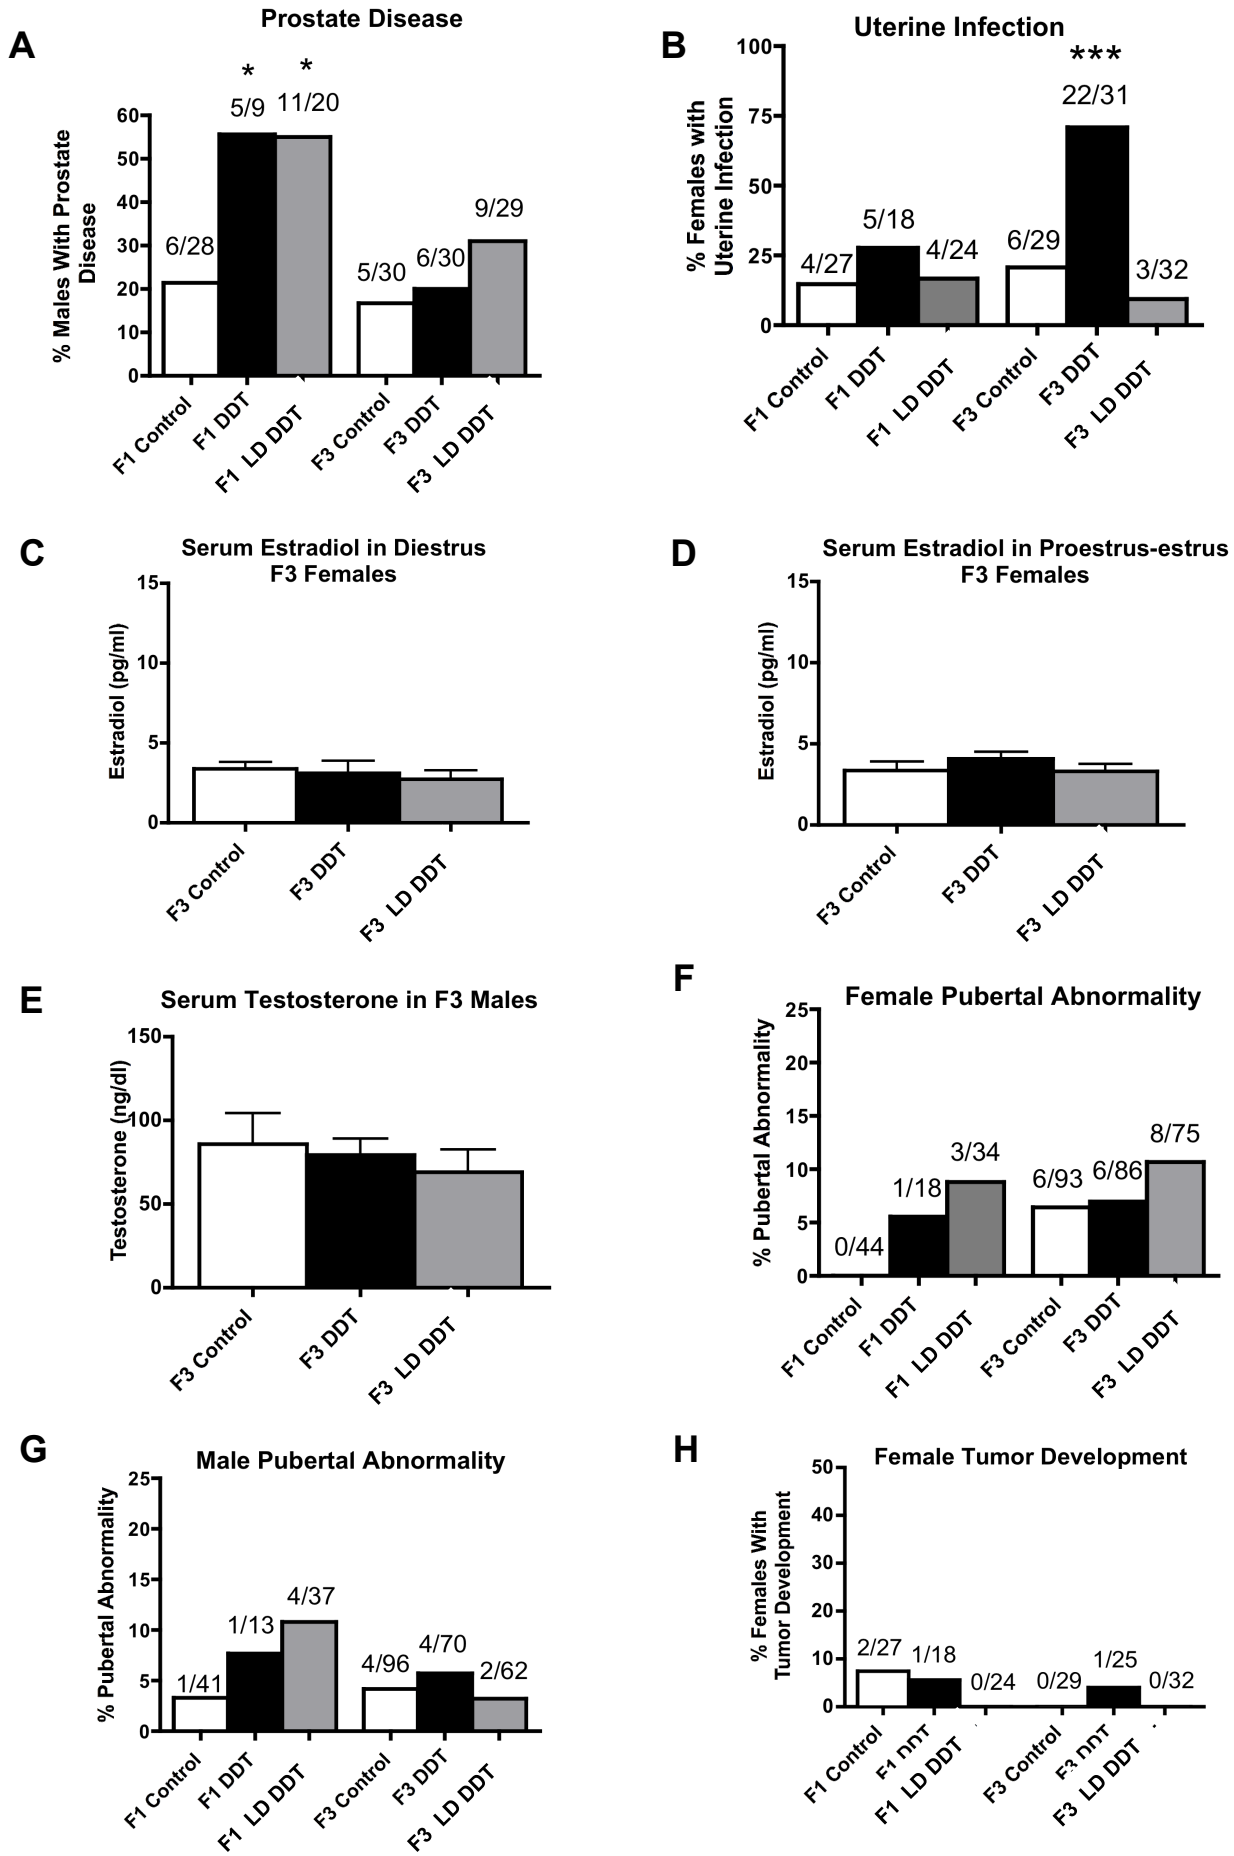

# Supplemental Figure S2 (continued)

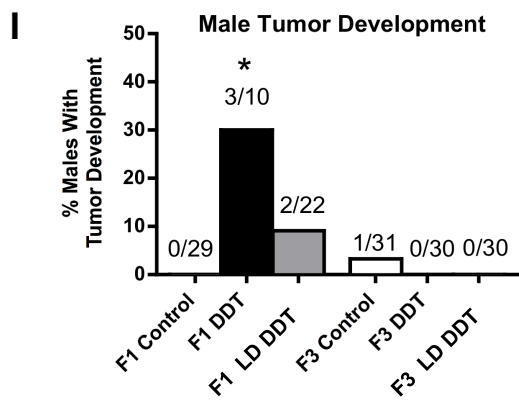

Supplement: 1741-7015-11-228-S3.pdf [file 1741-7015-11-228-S3.pdf]
