# Supplementary material for: Ancestral dichlorodiphenyltrichloroethane (DDT) exposure promotes epigenetic transgenerational inheritance of obesity
Source: PubMed Central journal article supplement (PMC3853586; doi:10.1186/1741-7015-11-228), 2013-10-23
Supplement: 1741-7015-11-228-S4.pdf [file 1741-7015-11-228-S4.pdf]

**Supplemental Table S2A.**

Individual disease incidence in F1 generation female rats of Control, DDT and Lower Dose DDT lineages.

| Serial Number | Rat ID      | Puberty | Ovary | Uterus | Kidney | Obesity | Tumor | Total Disease |
|---------------|-------------|---------|-------|--------|--------|---------|-------|---------------|
| C1            | MCTT2-1-1-1 | -       |       | -      | -      | -       | -     |               |
| C2            | MCTT2-1-1-2 | -       |       | +      | -      | -       | -     | 1             |
| C3            | MCWW0-1-2-1 | -       |       | -      |        | -       | +     | 1             |
| C4            | MCWW0-1-2-2 | -       | -     | -      | -      | -       | -     |               |
| C5            | MCWW0-1-2-3 | -       | -     | -      | -      | -       | -     |               |
| C6            | MCWW0-1-2-4 | -       | -     | -      | -      | -       | -     |               |
| C7            | MCAA0-1-3-1 | -       | -     | -      | -      | -       | -     |               |
| C8            | MCAA0-1-3-2 | -       |       | -      | -      | -       | -     |               |
| C9            | MCAA0-1-3-3 | -       | -     | +      | -      | -       | -     | 1             |
| C10           | MCAA0-1-3-4 | -       |       | +      | -      | -       | -     | 1             |
| C11           | MCGG1-1-4-1 | -       | -     | -      | -      | +       | -     | 1             |
| C12           | MCGG1-1-4-2 | -       | -     | -      |        | +       | -     | 1             |
| C13           | MCGG1-1-4-3 | -       | -     | -      |        | -       | +     | 1             |
| C14           | MCGG1-1-4-4 | -       | -     | -      |        | -       | -     |               |
| C15           | MCWW0-1-6-1 | -       | -     | -      | -      | -       | -     |               |
| C16           | MCWW0-1-6-2 | -       | -     | -      | -      | -       | -     |               |
| C17           | MCWW0-1-6-3 | -       | -     | -      | -      | -       | -     |               |
| C18           | MCWW0-1-6-4 | -       | -     | -      | -      | -       | -     |               |
| C19           | MCGG2-1-7-1 | -       |       | -      | -      | -       | -     |               |
| C20           | MCGG2-1-7-2 | -       |       | -      | -      | -       | -     |               |
| C21           | MCGG2-1-7-3 | -       |       | -      | -      | -       | -     |               |
| C22           | MCGG2-1-7-4 | -       |       | -      | +      | -       | -     | 1             |
| C23           | MCZZ0-1-8-1 | -       |       | -      | -      | -       | -     |               |
| C24           | MCZZ0-1-8-2 | -       |       | +      | +      | -       | -     | 2             |
| C25           | MCZZ0-1-8-3 | -       |       | -      | -      | +       | -     | 1             |
| C26           | MCZZ0-1-8-4 | -       |       | -      | -      | -       | -     |               |
| C27           | MCZZ0-1-8-5 | -       |       | -      | -      | +       | -     | 1             |

| Serial Number | Rat ID      | Puberty | Ovary | Uterus | Kidney | Obesity | Tumor | Total Disease |
|---------------|-------------|---------|-------|--------|--------|---------|-------|---------------|
| D1            | MDLL2-1-1-1 | -       | -     | -      | +      | -       | -     | 1             |
| D2            | MDLL2-1-1-2 | -       | +     | +      | +      | -       | -     | 3             |
| D3            | MDLL2-1-1-3 | -       | +     | -      | -      | -       | -     | 1             |
| D4            | MDLL2-1-1-4 | +       |       | -      |        | +       | +     | 3             |
| D5            | MDAA1-1-2-1 | -       |       | -      | -      | -       | -     |               |
| D6            | MDAA1-1-2-2 | -       |       | -      | -      | -       | -     |               |
| D7            | MDAA1-1-2-3 | -       |       | -      | -      | -       | -     |               |
| D8            | MDAA1-1-2-4 | -       |       | -      | -      | -       | -     |               |
| D9            | MDAA1-1-2-5 | -       |       | -      | -      | -       | -     |               |
| D10           | MDGG0-1-3-1 | -       | +     | -      | -      | -       | -     | 1             |
| D11           | MDGG0-1-3-2 | -       | -     | +      | +      | -       | -     | 2             |
| D12           | MDGG0-1-3-3 | -       | -     | +      | -      | -       | -     | 1             |
| D13           | MDGG0-1-3-4 | -       | +     | -      | -      | -       | -     | 1             |

|     |             |   |   |   |   |   |   |   |
|-----|-------------|---|---|---|---|---|---|---|
| D14 | MDGG0-1-3-5 | - | - | - | + | - | - | 1 |
| D15 | MDGG0-1-3-6 | - | + | + | - | - | - | 2 |
| D16 | MDGG0-1-3-7 | - | - | + | + | - | - | 2 |
| D17 | MDGG0-1-3-8 | - |   | - | + | - | - | 1 |
| D18 | MDGG0-1-3-9 | - |   | - | + | - | - | 1 |

| Serial Number | Rat ID       | Puberty | Ovary | Uterus | Kidney | Obesity | Tumor | Total Disease |
|---------------|--------------|---------|-------|--------|--------|---------|-------|---------------|
| LD1           | MLDLL0-1-1-2 | -       |       | -      | -      | -       | -     |               |
| LD2           | MLDKK0-1-2-3 | -       | +     | -      |        | -       | -     | 1             |
| LD3           | MLDJJ2-1-3-1 | -       | -     | -      | -      | -       | -     |               |
| LD4           | MLDJJ2-1-3-2 | -       | -     | -      | -      | -       | -     |               |
| LD5           | MLDJJ2-1-3-3 | -       | -     | -      | -      | -       | -     |               |
| LD6           | MLDJJ2-1-3-4 | -       |       | +      | -      | -       | -     | 1             |
| LD7           | MLDHH0-1-4-1 | -       | -     | -      | -      | -       | -     |               |
| LD8           | MLDHH0-1-4-2 | -       | -     | -      | +      | -       | -     | 1             |
| LD9           | MLDHH0-1-4-3 | -       | +     | -      | -      | -       | -     | 1             |
| LD10          | MLDHH0-1-4-4 | -       | -     | -      | -      | -       | -     |               |
| LD11          | MLDHH0-1-4-5 | -       | +     | -      | +      | -       | -     | 2             |
| LD12          | MLDLL2-1-5-1 | -       | -     | -      | -      | -       | -     |               |
| LD13          | MLDLL2-1-5-2 | -       | -     | +      | -      | -       | -     | 1             |
| LD14          | MLDLL2-1-5-3 | +       |       | +      | +      | -       | -     | 3             |
| LD15          | MLDLL2-1-5-4 | -       |       | -      | -      | -       | -     |               |
| LD16          | MLDLL2-1-5-5 | -       |       | -      | +      | -       | -     | 1             |
| LD17          | MLDLL2-1-5-6 | -       |       | -      | -      | -       | -     |               |
| LD18          | MLDRR1-1-6-1 | -       |       | +      | +      | -       | -     | 2             |
| LD19          | MLDRR1-1-6-2 | -       |       | -      | +      | -       | -     | 1             |
| LD20          | MLDRR1-1-6-3 | -       |       | -      | -      | -       | -     |               |
| LD21          | MLDRR1-1-6-4 | +       |       | -      |        | -       | -     | 1             |
| LD22          | MLDRR1-1-6-5 | -       |       | -      | +      | -       | -     | 1             |
| LD23          | MLDRR1-1-6-6 | -       |       | -      | -      | -       | -     |               |
| LD24          | MLDRR1-1-6-7 | +       |       | -      | +      | -       | -     | 2             |

A '+' indicates the presence; A '-' indicates the absence of disease; A blank cell indicates 'not determined.' Animal IDs with a 'C' belong to Control group, those with a 'D' belong to DDT group and those with a 'LD' belong to lower dose DDT group. See 'Materials and Methods' section for disease assessment in rats. The number of animals per litter (litter representation) mean  $\pm$  SEM used for each specific disease/abnormality assessment within the control, DDT or lower dose DDT lineages were not found to be statistically different ( $p > 0.05$ ), so no litter bias detected.

**Supplemental Table S2B.**

Individual disease incidence in F1 generation male rats of Control, DDT and Lower Dose DDT lineages.

| Serial Number | Rat ID       | Puberty | Testis | Prostate | Kidney | Obesity | Tumor | Total Disease |
|---------------|--------------|---------|--------|----------|--------|---------|-------|---------------|
| C1            | MCTT2-1-1-6  | -       | -      | +        | -      | -       | -     | 1             |
| C2            | MCTT2-1-1-7  | -       | +      | -        | +      | -       | -     | 2             |
| C3            | MCTT2-1-1-8  | -       | +      | -        | -      | -       | -     | 1             |
| C4            | MCTT2-1-1-9  | -       | -      | -        | -      | -       | -     |               |
| C5            | MCWW0-1-2-10 | -       | -      | -        | -      | -       | -     |               |
| C6            | MCWW0-1-2-11 | -       | -      | -        | -      | -       | -     |               |
| C7            | MCAA0-1-3-6  | -       | -      | -        | +      | -       | -     | 1             |
| C8            | MCAA0-1-3-7  | -       | -      | +        | -      | -       | -     | 1             |
| C9            | MCAA0-1-3-8  | -       | -      | -        | +      | -       | -     | 1             |
| C10           | MCAA0-1-3-9  | -       | -      | -        | +      | -       | -     | 1             |
| C11           | MCGG1-1-4-5  | -       | -      | +        | -      | -       | -     | 1             |
| C12           | MCGG1-1-4-6  | -       | -      | -        | -      | -       | -     |               |
| C13           | MCGG1-1-4-7  | -       | -      | -        | +      | -       | -     | 1             |
| C14           | MCGG1-1-4-8  | -       | -      | -        | -      | -       | -     |               |
| C15           | MCWW0-1-6-7  | -       | -      | +        | -      | +       | -     | 2             |
| C16           | MCWW0-1-6-8  | -       | -      | -        | -      | -       | -     |               |
| C17           | MCWW0-1-6-9  | -       | -      | -        | -      | -       | -     |               |
| C18           | MCWW0-1-6-10 | -       | -      | -        | -      | -       | -     |               |
| C19           | MCWW0-1-6-11 | -       | -      | -        | -      | -       | -     |               |
| C20           | MCWW0-1-6-12 | -       | -      | +        | -      | -       | -     | 1             |
| C21           | MCGG2-1-7-6  | -       | -      | -        | -      | -       | -     |               |
| C22           | MCGG2-1-7-7  | -       | -      | -        | -      | -       | -     |               |
| C23           | MCGG2-1-7-8  | -       | -      | -        | -      | -       | -     |               |
| C24           | MCGG2-1-7-9  | -       | -      | -        | -      | -       | -     |               |
| C25           | MCZZ0-1-8-6  | -       | -      | -        | -      | -       | -     |               |
| C26           | MCZZ0-1-8-7  | -       | -      | -        | -      | -       | -     |               |
| C27           | MCZZ0-1-8-8  | -       | -      | -        | -      | +       | -     | 1             |
| C28           | MCZZ0-1-8-9  | -       | +      | -        | -      | +       | -     | 2             |
| C29           | MCZZ0-1-8-10 | +       | -      | +        | -      | -       | -     | 2             |

| Serial Number | Rat ID       | Puberty | Testis | Prostate | Kidney | Obesity | Tumor | Total Disease |
|---------------|--------------|---------|--------|----------|--------|---------|-------|---------------|
| D1            | MDLL2-1-1-5  | -       | -      | +        | +      | -       | -     | 2             |
| D2            | MDLL2-1-1-6  | -       | -      | -        | -      | -       | +     | 1             |
| D3            | MDAA1-1-2-6  | -       | -      | +        | -      | -       | -     | 1             |
| D4            | MDAA1-1-2-7  | -       | -      | -        | +      | -       | -     | 1             |
| D5            | MDAA1-1-2-8  | -       | -      | -        | -      | -       | -     |               |
| D6            | MDAA1-1-2-9  | -       | -      | +        | -      | -       | -     | 1             |
| D7            | MDAA1-1-2-11 | +       | -      | -        | -      | -       | -     | 1             |
| D8            | MDGG0-1-3-10 | -       | -      | -        | -      | -       | -     |               |
| D9            | MDGG0-1-3-11 | -       | -      | +        | -      | -       | +     | 2             |
| D10           | MDGG0-1-3-12 | -       | -      | +        | -      | -       | +     | 2             |

| Serial Number | Rat ID        | Puberty | Testis | Prostate | Kidney | Obesity | Tumor | Total Disease |
|---------------|---------------|---------|--------|----------|--------|---------|-------|---------------|
| LD1           | MLDLL0-1-1-2  | -       | -      | -        | +      | -       | -     | 1             |
| LD2           | MLDLL0-1-1-3  | -       | -      | +        | +      | -       | -     | 2             |
| LD3           | MLDLL0-1-1-4  | -       | -      | +        | +      | -       | -     | 2             |
| LD4           | MLDLL0-1-1-7  | -       | -      |          | +      | +       | -     | 2             |
| LD5           | MLDJJ2-1-3-5  | -       | -      | +        | +      | +       | -     | 3             |
| LD6           | MLDJJ2-1-3-6  | -       | +      | +        | -      | +       | -     | 3             |
| LD7           | MLDJJ2-1-3-7  | -       | -      | -        | +      | -       | -     | 1             |
| LD8           | MLDJJ2-1-3-8  | -       | -      | -        | -      | +       | -     | 1             |
| LD9           | MLDJJ2-1-3-9  | -       | -      | +        | -      | -       | +     | 2             |
| LD10          | MLDHH0-1-4-6  | +       | -      | -        | +      | -       | -     | 2             |
| LD11          | MLDHH0-1-4-7  | +       | -      | +        | -      | -       | -     | 2             |
| LD12          | MLDHH0-1-4-8  | +       | -      | +        | -      | -       | -     | 2             |
| LD13          | MLDHH0-1-4-9  | +       | -      | -        | +      | -       | -     | 2             |
| LD14          | MLDLL2-1-5-7  | -       |        |          | -      | -       | +     | 1             |
| LD15          | MLDLL2-1-5-8  | -       | -      | -        | +      | -       | -     | 1             |
| LD16          | MLDLL2-1-5-9  | -       | -      | +        | -      | -       | -     | 1             |
| LD17          | MLDLL2-1-5-10 | -       | -      | -        | +      | -       | -     | 1             |
| LD18          | MLDRR1-1-6-8  | -       | -      | +        | +      | -       | -     | 2             |
| LD19          | MLDRR1-1-6-9  | -       | -      | +        | +      | -       | -     | 2             |
| LD20          | MLDRR1-1-6-10 | -       | -      | -        | -      | -       | -     |               |
| LD21          | MLDRR1-1-6-11 | -       | +      | +        | +      | -       | -     | 3             |
| LD22          | MLDRR1-1-6-12 | -       | +      | -        | +      | -       | -     | 2             |

A '+' indicates the presence; A '-' indicates the absence of disease; A blank cell indicates 'not determined.' Animal IDs with a 'C' belong to Control group, those with a 'D' belong to DDT group and those with a 'LD' belong to lower dose DDT group. See 'Materials and Methods' section for disease assessment in rats. The number of animals per litter (litter representation) mean  $\pm$  SEM used for each specific disease/abnormality assessment within the control, DDT or lower dose DDT lineages were not found to be statistically different ( $p > 0.05$ ), so no litter bias detected.
