# Supplementary material for: Ancestral dichlorodiphenyltrichloroethane (DDT) exposure promotes epigenetic transgenerational inheritance of obesity
Source: PubMed Central journal article supplement (PMC3853586; doi:10.1186/1741-7015-11-228), 2013-10-23
Supplement: 1741-7015-11-228-S5.pdf [file 1741-7015-11-228-S5.pdf]

### Supplemental Table S3A

A. Individual disease incidence in F3 generation female rats of Control, DDT and Lower Dose DDT lineages.

| Serial # | Rat ID       | Puberty | Ovary | Uterus | Kidney | Tumor | Obesity | Total Disease |
|----------|--------------|---------|-------|--------|--------|-------|---------|---------------|
| C1       | MCTT2-3-1-1  | -       | -     | -      | +      | -     | -       | 1             |
| C2       | MCTT2-3-1-2  | -       | -     | +      | -      | -     | -       | 1             |
| C3       | MCGG1-3-2-1  | +       | -     | -      | -      | -     | -       | 1             |
| C4       | MCGG1-3-2-2  | +       | -     | +      | -      | -     | -       | 2             |
| C5       | MCGG1-3-3-1  | -       | -     | -      | -      | -     | -       |               |
| C6       | MCGG1-3-3-2  | -       | -     | -      | -      | -     | -       |               |
| C7       | MCWW0-3-4-1  | -       | -     | -      | -      | -     | -       |               |
| C8       | MCWW0-3-4-2  | -       | -     | -      | -      | -     | -       |               |
| C9       | MCGG1-3-6-1  | -       | -     | -      | -      | -     | -       |               |
| C10      | MCAA0-3-7-1  | -       | -     | -      | -      | -     | -       |               |
| C11      | MCAA0-3-7-2  | -       | -     | -      | -      | -     | +       | 1             |
| C12      | MCGG2-3-8-1  | -       | -     | -      | +      | -     | -       | 1             |
| C13      | MCGG2-3-8-2  | -       | -     | -      | +      | -     | -       | 1             |
| C14      | MCTT2-3-9-1  | -       | -     | -      | +      | -     | -       | 1             |
| C15      | MCTT2-3-9-2  | -       | -     | +      | +      | -     | -       | 2             |
| C16      | MCWW0-3-10-1 | -       | -     | -      | -      | -     | -       |               |
| C17      | MCGG2-3-12-1 | -       | -     | -      | -      | -     | -       |               |
| C18      | MCGG1-3-13-1 | -       | -     | -      | -      | -     | -       |               |
| C19      | MCGG1-3-14-1 | -       | -     | +      | -      | -     | -       | 1             |
| C20      | MCGG1-3-15-1 | -       | -     | -      | -      | -     | -       |               |
| C21      | MCWW0-3-16-1 | -       | -     | -      | -      | -     | -       |               |
| C22      | MCWW0-3-16-2 | -       | -     | -      | -      | -     | -       |               |
| C23      | MCGG1-3-17-1 | -       | -     | -      | -      | -     | -       |               |
| C24      | MCAA0-3-18-1 | -       | -     | -      | -      | -     | -       |               |
| C25      | MCAA0-3-19-1 | -       | -     | +      | -      | -     | -       | 1             |
| C26      | MCAA0-3-19-2 | -       | -     | +      | -      | -     | -       | 1             |
| C27      | MCGG2-3-20-1 | -       | -     | -      | -      | -     | -       |               |
| C28      | MCAA0-3-21-1 | -       | -     | -      | -      | -     | -       |               |
| C29      | MCGG1-3-22-1 | -       | -     | -      | -      | -     | -       |               |

| Serial # | Rat ID      | Puberty | Ovary | Uterus | Kidney | Tumor | Obesity | Total Disease |
|----------|-------------|---------|-------|--------|--------|-------|---------|---------------|
| D1       | MDGG0-3-1-1 | -       | -     | -      | +      | -     | +       | 2             |
| D2       | MDGG0-3-1-2 | -       | +     | +      | +      | -     | -       | 3             |
| D3       | MDGG0-3-1-3 | -       | -     | +      | -      | -     | -       | 1             |
| D4       | MDGG0-3-2-1 | -       | -     | +      | +      | -     | -       | 2             |
| D5       | MDGG0-3-2-2 | -       | +     | -      | +      | -     | +       | 3             |
| D6       | MDGG0-3-2-3 | -       | +     | -      | -      | -     | -       | 1             |
| D7       | MDGG0-3-3-1 | +       | +     | +      | -      | -     | -       | 3             |
| D8       | MDGG0-3-3-2 | -       | +     | +      | +      | -     | -       | 3             |
| D9       | MDGG0-3-3-3 | -       | -     | -      | +      | -     | +       | 2             |
| D10      | MDAA1-3-4-2 | -       | -     | +      | -      | -     | -       | 1             |
| D11      | MDAA1-3-4-3 | -       | -     | +      | +      | -     | -       | 2             |

|     |              |   |   |   |   |   |   |   |
|-----|--------------|---|---|---|---|---|---|---|
| D12 | MDGG0-3-5-1  | - |   | + |   | - | - | 1 |
| D13 | MDGG0-3-5-2  | - | + | - | - | - | - | 1 |
| D14 | MDGG0-3-5-3  | - |   | - | - | - | - |   |
| D15 | MDGG0-3-6-1  | - | + | - | - | - | - | 1 |
| D16 | MDAA1-3-7-1  | - | + | + | + | - | - | 3 |
| D17 | MDGG0-3-8-1  | - | + | + | - | - | - | 2 |
| D18 | MDGG0-3-8-2  | - | - | + | - | - | - | 1 |
| D19 | MDAA1-3-9-2  | + | + | + | - | - | - | 3 |
| D20 | MDAA1-3-9-6  | - |   | + |   | - | - | 1 |
| D21 | MDAA1-3-10-1 | - | + | + | - | - | - | 2 |
| D22 | MDAA1-3-10-2 | - | - | - | - | - | - |   |
| D23 | MDGG0-3-11-1 | + | - | + | - | - | - | 2 |
| D24 | MDGG0-3-11-2 | + | + | + | - | - | - | 3 |
| D25 | MDGG0-3-12-1 | - | + | + |   |   | + | 3 |
| D26 | MDGG0-3-12-2 | - |   | + |   |   |   | 1 |
| D27 | MDGG0-3-12-3 | - |   | - |   | + |   | 1 |
| D28 | MDGG0-3-13-1 | - |   | + |   |   |   | 1 |
| D29 | MDGG0-3-13-2 | - |   | + |   |   |   | 1 |
| D30 | MDGG0-3-13-3 | - |   | + |   |   |   | 1 |
| D31 | MDGG0-3-13-5 | - |   | + |   |   |   | 1 |

| Serial # | Rat ID        | Puberty | Ovary | Uterus | Kidney | Tumor | Obesity | Total Disease |
|----------|---------------|---------|-------|--------|--------|-------|---------|---------------|
| LD1      | MLDLL2-3-1-1  | -       | +     | -      | -      | -     | +       | 2             |
| LD2      | MLDLL2-3-1-2  | -       | -     | -      | -      | -     | -       |               |
| LD3      | MLDLL2-3-2-1  | -       | +     | -      | -      | -     | +       | 2             |
| LD4      | MLDLL2-3-2-2  | -       | +     | -      | +      | -     | -       | 2             |
| LD5      | MLDRR1-3-3-1  | -       | -     | -      | +      | -     | -       | 1             |
| LD6      | MLDRR1-3-3-2  | -       | +     | -      | +      | -     | -       | 2             |
| LD7      | MLDLL2-3-4-1  | -       | -     | -      | -      | -     | +       | 1             |
| LD8      | MLDKK0-3-5-1  | -       | -     | -      | +      | -     | +       | 2             |
| LD9      | MLDKK0-3-5-2  | -       | -     | -      | -      | -     | +       | 1             |
| LD10     | MLDHH0-3-6-1  | -       | -     | -      | +      | -     | +       | 2             |
| LD11     | MLDHH0-3-6-2  | -       | -     | +      | +      | -     | +       | 3             |
| LD12     | MLDJJ2-3-7-1  | +       | +     | -      | -      | -     | +       | 3             |
| LD13     | MLDJJ2-3-7-2  | -       |       | -      | -      | -     | -       |               |
| LD14     | MLDJJ2-3-8-1  | -       | -     | -      | -      | -     | -       |               |
| LD15     | MLDJJ2-3-8-2  | -       | -     | -      | +      | -     | -       | 1             |
| LD16     | MLDJJ2-3-9-1  | -       |       | -      | -      | -     | -       |               |
| LD17     | MLDJJ2-3-9-2  | -       | -     | -      | -      | -     | -       |               |
| LD18     | MLDKK0-3-10-1 | -       | -     | -      | -      | -     | -       |               |
| LD19     | MLDJJ2-3-11-1 | +       | -     | -      | -      | -     | +       | 2             |
| LD20     | MLDJJ2-3-11-5 | -       |       | -      |        | -     | +       | 1             |
| LD21     | MLDJJ2-3-12-1 | -       |       | +      | +      | -     | -       | 2             |
| LD22     | MLDJJ2-3-12-2 | -       |       | -      | +      | -     | +       | 2             |
| LD23     | MLDJJ2-3-13-1 | +       |       | -      | -      | -     | +       | 2             |
| LD24     | MLDJJ2-3-14-1 | -       | -     | -      | +      | -     | +       | 2             |
| LD25     | MLDJJ2-3-14-3 | -       | +     | -      | -      | -     | +       | 2             |
| LD26     | MLDRR1-3-15-1 | -       | +     | -      | -      | -     | -       | 1             |

|      |               |   |   |   |   |   |   |
|------|---------------|---|---|---|---|---|---|
| LD27 | MLDRR1-3-15-2 | - | - | + | - | - | 1 |
| LD28 | MLDHH0-3-16-1 | - | + | + | - | - | 2 |
| LD29 | MLDHH0-3-16-2 | - | - | + | - | - | 1 |
| LD30 | MLDLL2-3-17-1 | - | - | + | - | - | 1 |
| LD31 | MLDRR1-3-18-1 | + | - | - | - | + | 2 |
| LD32 | MLDRR1-3-19-1 | - | - | + | - | + | 2 |

A '+' indicates the presence; A '-' indicates the absence of disease; A blank cell indicates 'not determined.' Animal IDs with a 'C' belong to Control group, those with a 'D' belong to DDT group and those with a 'LD' belong to lower dose DDT group. See 'Materials and Methods' section for disease assessment in rats. The number of animals per litter (litter representation) mean  $\pm$  SEM used for each specific disease/abnormality assessment within the control, DDT or lower dose DDT lineages were not found to be statistically different ( $p > 0.05$ ), so no litter bias detected.

### Supplemental Table S3B.

Individual disease incidence in F3 generation male rats of Control, DDT and Lower Dose DDT lineages.

| Serial # | Rat ID        | Puberty | Testis | Prostate | Kidney | Tumor | Obesity | Total Disease |
|----------|---------------|---------|--------|----------|--------|-------|---------|---------------|
| C1       | MCTT2-3-1-5   | -       | -      | -        | -      | -     | -       |               |
| C2       | MCTT2-3-1-6   | -       | -      | -        | -      | -     | -       |               |
| C3       | MCGG1-3-2-10  | -       | -      | -        | -      | -     | -       |               |
| C4       | MCGG1-3-2-11  | -       | -      | -        | -      | -     | -       |               |
| C5       | MCGG1-3-3-6   | -       | +      | -        | -      | -     | -       | 1             |
| C6       | MCGG1-3-3-7   | -       | +      | -        | -      | -     | -       | 1             |
| C7       | MCWW0-3-4-4   | -       | -      | +        | +      | -     | +       | 3             |
| C8       | MCWW0-3-4-5   | -       | -      | -        | -      | -     | -       |               |
| C9       | MCGG1-3-6-8   | -       | -      | +        | +      | -     | -       | 2             |
| C10      | MCAA0-3-7-6   | -       | -      | -        | -      | -     | -       |               |
| C11      | MCAA0-3-7-7   | -       | -      | -        | -      | -     | -       |               |
| C12      | MCGG2-3-8-7   | -       | +      | -        | -      | -     | -       | 1             |
| C13      | MCGG2-3-8-8   | -       | -      | -        | -      | -     | -       |               |
| C14      | MCTT2-3-9-5   | -       | -      | -        | -      | -     | +       | 1             |
| C15      | MCTT2-3-9-6   | -       | -      | -        | -      | -     | +       | 1             |
| C16      | MCWW0-3-10-9  | -       | +      | -        | -      | -     | -       | 1             |
| C17      | MCWW0-3-10-10 | -       | -      | -        | -      | -     | +       | 1             |
| C18      | MCGG2-3-12-4  | -       | -      | -        | -      | -     | +       | 1             |
| C19      | MCGG1-3-13-5  | -       | -      | +        | -      | -     | -       | 1             |
| C20      | MCGG1-3-14-4  | -       | -      | -        | -      | -     | -       |               |
| C21      | MCGG1-3-15-3  | -       | +      | -        | -      | -     | -       | 1             |
| C22      | MCWW0-3-16-5  | -       | -      | +        | -      | -     | -       | 1             |
| C23      | MCWW0-3-16-6  | -       | -      | -        | -      | -     | -       |               |
| C24      | MCGG1-3-17-4  | +       | -      | -        | -      | -     | -       | 1             |
| C25      | MCAA0-18-2    | -       | -      | -        | -      | -     | -       |               |
| C26      | MCAA0-3-19-5  | -       | -      | -        | -      | -     | +       | 1             |
| C27      | MCAA0-3-19-6  | -       | +      | -        | +      | -     | -       | 2             |
| C28      | MCGG2-3-20-9  | -       | -      | -        | -      | -     | +       | 1             |
| C29      | MCGG2-3-20-10 | -       | -      | -        | -      | +     | -       | 1             |
| C30      | MCAA0-3-21-5  | -       | -      | +        | -      | -     | -       | 1             |
| C31      | MCGG1-3-22-8  | -       | -      | -        | -      | -     | -       |               |

| Serial # | Rat ID       | Puberty | Testis | Prostate | Kidney | Tumor | Obesity | Total Disease |
|----------|--------------|---------|--------|----------|--------|-------|---------|---------------|
| D1       | MDGG0-3-1-8  | -       | -      | -        | -      | -     | +       | 1             |
| D2       | MDGG0-3-1-9  | -       | +      | -        | +      | -     | -       | 2             |
| D3       | MDGG0-3-1-10 | -       | -      | -        | -      | -     | -       |               |
| D4       | MDGG0-3-2-10 | -       | -      | -        | +      | -     | -       | 1             |
| D5       | MDGG0-3-2-11 | -       | -      | -        | +      | -     | -       | 1             |
| D6       | MDGG0-3-2-12 | -       | -      | -        | -      | -     | -       |               |
| D7       | MDGG0-3-3-12 | -       | -      | +        | -      | -     | -       | 1             |
| D8       | MDGG0-3-3-13 | -       | -      | -        | -      | -     | +       | 1             |
| D9       | MDGG0-3-3-14 | -       | -      | -        | -      | -     | +       | 1             |

|     |               |   |   |   |   |   |   |   |
|-----|---------------|---|---|---|---|---|---|---|
| D10 | MDAA1-3-4-7   | - | + | + | - | - | + | 3 |
| D11 | MDAA1-3-4-8   | - | - | - | + | - | + | 2 |
| D12 | MDAA1-3-4-9   | - | - | - | - | - | + | 1 |
| D13 | MDGG0-3-5-10  | - | + | - | - | - | + | 2 |
| D14 | MDGG0-3-5-11  | - | + | - | - | - | + | 2 |
| D15 | MDGG0-3-5-12  | - | - | + | - | - | - | 1 |
| D16 | MDGG0-3-6-7   | - | - | - | - | - | + | 1 |
| D17 | MDAA1-3-7-4   | - | + | - | - | - | + | 2 |
| D18 | MDGG0-3-8-7   | - | + | - | + | - | + | 3 |
| D19 | MDGG0-3-8-8   | - | + | - | - | - | + | 2 |
| D20 | MDAA1-3-9-8   | - | - | + | - | - | + | 2 |
| D21 | MDAA1-3-9-9   | - | + | - | - | - | + | 2 |
| D22 | MDAA1-3-10-4  | + | + | - | + | - | + | 4 |
| D23 | MDAA1-3-10-5  | + | + | + | - | - | + | 4 |
| D24 | MDGG0-3-11-6  | - | + | - | + | - | + | 3 |
| D25 | MDGG0-3-11-7  | - | + | - | + | - | + | 3 |
| D26 | MDGG0-3-12-5  | - | - | + | + | - | + | 3 |
| D27 | MDGG0-3-12-6  | - | + | - | + | - | + | 3 |
| D28 | MDGG0-3-13-12 | - | + | - | - | - | + | 2 |
| D29 | MDGG0-3-13-13 | - | - | - | - | - | + | 1 |
| D30 | MDGG0-3-13-14 | - | - | - | - | - | + | 1 |

| Serial # | Rat ID         | Puberty | Testis | Prostate | Kidney | Tumor | Obesity | Total Disease |
|----------|----------------|---------|--------|----------|--------|-------|---------|---------------|
| LD1      | MLDLL2-3-1-6   | -       | -      | -        | +      | -     | +       | 2             |
| LD2      | MLDLL2-3-1-7   | -       | -      | +        | +      | -     | +       | 3             |
| LD3      | MLDLL2-3-1-8   | +       | +      |          |        | -     | +       | 3             |
| LD4      | MLDLL2-3-2-6   | -       | -      | -        | -      | -     | +       | 1             |
| LD5      | MLDLL2-3-2-7   | -       | -      | +        | +      | -     | +       | 3             |
| LD6      | MLDRR1-3-3-4   | -       | +      | -        | -      | -     | -       | 1             |
| LD7      | MLDRR1-3-3-5   | -       | -      | -        | -      | -     | -       |               |
| LD8      | MLDRR1-3-3-6   | -       | -      | -        | -      | -     | -       |               |
| LD9      | MLDLL2-3-4-3   | -       | -      | +        | -      | -     | -       | 1             |
| LD10     | MLDKK0-3-5-6   | -       | +      | -        | -      | -     | +       | 2             |
| LD11     | MLDKK0-3-5-7   | -       | -      | -        | +      | -     | +       | 2             |
| LD12     | MLDHH0-3-6-9   | -       | +      | -        | -      | -     | +       | 2             |
| LD13     | MLDHH0-3-6-10  | -       | -      | -        | -      | -     | +       | 1             |
| LD14     | MLDJJ2-3-7-6   | -       | -      | -        | +      | -     | -       | 1             |
| LD15     | MLDJJ2-3-7-7   | -       | -      | +        | +      | -     | -       | 2             |
| LD16     | MLDJJ2-3-8-12  | -       | -      | +        | +      | -     | +       | 3             |
| LD17     | MLDJJ2-3-8-13  | -       | -      | +        | +      | -     | -       | 2             |
| LD18     | MLDJJ2-3-9-8   | -       | -      | -        | +      | -     | +       | 2             |
| LD19     | MLDJJ2-3-9-9   | -       | -      | -        | +      | -     | +       | 2             |
| LD20     | MLDKK0-3-10-9  | -       | -      | +        | -      | -     | +       | 2             |
| LD21     | MLDJJ2-3-11-5  | -       | -      | -        | +      | -     | -       | 1             |
| LD22     | MLDJJ2-3-12-2  | -       | -      | -        | +      | -     | -       | 1             |
| LD23     | MLDJJ2-3-14-9  | -       | +      | -        | +      | -     | -       | 2             |
| LD24     | MLDJJ2-3-14-10 | -       | +      | +        | +      | -     | -       | 3             |

|      |                |   |   |   |   |   |   |   |
|------|----------------|---|---|---|---|---|---|---|
| LD25 | MLDRR1-3-15-10 | - | + | - | + | - | - | 2 |
| LD26 | MLDRR1-3-15-11 | - | - | + | - | - | - | 1 |
| LD27 | MLDHH0-3-16-7  | - | - | - | + | - | + | 2 |
| LD28 | MLDLL2-3-17-7  | - | + | - | - | - | + | 2 |
| LD29 | MLDRR1-3-18-9  | - | - | - | + | - | + | 2 |
| LD30 | MLDRR1-3-19-5  | - | + | - | + | - | - | 2 |

A '+' indicates the presence; A '-' indicates the absence of disease; A blank cell indicates 'not determined.' Animal IDs with a 'C' belong to Control group, those with a 'D' belong to DDT group and those with a 'LD' belong to lower dose DDT group. See 'Materials and Methods' section for disease assessment in rats. The number of animals per litter (litter representation) mean  $\pm$  SEM used for each specific disease/abnormality assessment within the control, DDT or lower dose DDT lineages were not found to be statistically different ( $p > 0.05$ ), so no litter bias detected.
