# Supplementary material for: Ancestral dichlorodiphenyltrichloroethane (DDT) exposure promotes epigenetic transgenerational inheritance of obesity
Source: PubMed Central journal article supplement (PMC3853586; doi:10.1186/1741-7015-11-228), 2013-10-23
Supplement: 1741-7015-11-228-S6.pdf [file 1741-7015-11-228-S6.pdf]

**Supplemental Table S4A.**

Individual disease incidence in F4 generation Outcross female rats of Control and Lower Dose DDT lineages.

| Serial Number | Rat ID      | Puberty | Ovary | Uterus | Kidney | Tumor | Obesity | Total Disease |
|---------------|-------------|---------|-------|--------|--------|-------|---------|---------------|
| C1            | MOC5-O4-1-1 | -       | -     | -      | -      | -     | -       |               |
| C2            | MOC5-O4-1-2 | -       | -     | -      | -      | -     | -       |               |
| C3            | MOC5-O4-1-3 | -       | -     | -      | -      | -     | -       |               |
| C4            | MOC5-O4-1-4 | -       | -     | -      | +      | -     | -       | 1             |
| C5            | MOC5-O4-1-5 | +       | -     | -      | +      | -     | -       | 2             |
| C6            | MOC5-O4-1-6 | +       | -     | -      | -      | -     | -       | 1             |
| C7            | MOC5-O4-1-7 | -       | -     | -      | +      | -     | -       | 1             |
| C8            | MOC4-O4-2-1 | -       | -     | -      | -      | -     | -       |               |
| C9            | MOC4-O4-2-2 | -       | -     | -      | -      | -     | +       | 1             |
| C10           | MOC4-O4-2-3 | -       | -     | -      | -      | -     | -       |               |
| C11           | MOC4-O4-2-4 | -       | +     | -      | +      | -     | -       | 2             |
| C12           | MOC4-O4-2-6 | -       | -     | -      | -      | -     | +       | 1             |
| C13           | MOC4-O4-2-7 | -       | -     | -      | -      | -     | +       | 1             |
| C14           | MOC7-O4-3-1 | -       | -     | -      | -      | +     | -       | 1             |
| C15           | MOC7-O4-3-3 | -       | -     | +      | -      | -     | -       | 1             |
| C16           | MOC8-O4-4-1 | -       | -     | -      | -      | -     | -       |               |
| C17           | MOC8-O4-4-2 | -       | -     | -      | -      | -     | -       |               |
| C18           | MOC2-O4-5-1 | -       | +     | -      | -      | -     | -       | 1             |
| C19           | MOC2-O4-5-2 | -       | -     | -      | -      | -     | +       | 1             |
| C20           | MOC2-O4-5-3 | -       | -     | -      | -      | -     | +       | 1             |
| C21           | MOC2-O4-5-6 | -       | -     | -      | -      | -     | +       | 1             |
| C22           | MOC1-O4-6-1 | -       | -     | +      | -      | -     | -       | 1             |
| C23           | MOC1-O4-6-2 | -       | -     | +      | -      | -     | -       | 1             |
| C24           | MOC6-O4-7-1 | -       | -     | -      | -      | -     | +       | 1             |
| C25           | MOC6-O4-7-3 | -       | -     | -      | -      | -     | +       | 1             |

| Serial Number | Rat ID       | Puberty | Ovary | Uterus | Kidney | Tumor | Obesity | Total Disease |
|---------------|--------------|---------|-------|--------|--------|-------|---------|---------------|
| LD1           | MOLD9-O4-1-1 | -       | +     | -      | -      | -     | -       | 1             |
| LD2           | MOLD9-O4-1-2 | -       | -     | -      | -      | -     | -       |               |
| LD3           | MOLD9-O4-1-3 | -       | -     | -      | -      | -     | -       |               |
| LD4           | MOLD9-O4-1-4 | -       | -     | -      | +      | -     | -       | 1             |
| LD5           | MOLD9-O4-1-5 | -       | -     | +      | -      | -     | -       | 1             |
| LD6           | MOLD2-O4-2-1 | -       | -     | -      | -      | -     | +       | 1             |
| LD7           | MOLD2-O4-2-2 | -       | -     | -      | -      | -     | +       | 1             |
| LD8           | MOLD2-O4-2-3 | -       | -     | -      | -      | -     | +       | 1             |
| LD9           | MOLD2-O4-2-4 | -       | -     | -      | -      | -     | +       | 1             |
| LD10          | MOLD2-O4-2-5 | -       | -     | -      | -      | -     | +       | 1             |
| LD11          | MOLD3-O4-3-1 | -       | +     | -      | -      | -     | -       | 1             |
| LD12          | MOLD3-O4-3-2 | -       | +     | -      | +      | -     | -       | 2             |
| LD13          | MOLD3-O4-3-3 | -       | -     | -      | +      | -     | -       | 1             |
| LD14          | MOLD3-O4-3-4 | -       | -     | -      | -      | -     | +       | 1             |
| LD15          | MOLD3-O4-3-5 | -       | +     | -      | +      | -     | -       | 2             |

|      |              |   |   |   |   |   |   |   |
|------|--------------|---|---|---|---|---|---|---|
| LD16 | MOLD1-O4-4-1 | - | - | - | + | - | + | 2 |
| LD17 | MOLD1-O4-4-2 | - | - | - | - | - | - |   |
| LD18 | MOLD1-O4-4-3 | - | - | - | - | - | + | 1 |
| LD19 | MOLD1-O4-4-4 | - | - | - | - | - | + | 1 |
| LD20 | MOLD-04-5-2  | - | - | - | - | - | + | 1 |
| LD21 | MOLD-04-6-1  | - | - | - | - | - | + | 1 |
| LD22 | MOLD-04-6-4  | - | - | - | - | - | + | 1 |

A '+' indicates the presence; A '-' indicates the absence of disease; A blank cell indicates 'not determined.' Animal IDs with a 'C' belong to Control group, those with a 'LD' belong to lower dose DDT group. See 'Materials and Methods' section for disease assessment in rats. The number of animals per litter (litter representation) mean  $\pm$  SEM used for each specific disease/abnormality assessment within the control or lower dose DDT lineages were not found to be statistically different ( $p > 0.05$ ), so no litter bias detected.

**Supplemental Table S4B.**

Individual disease incidence in F4 generation Outcross male rats of Control and Lower Dose DDT lineages.

| Serial Number | Rat ID       | Puberty | Testis | Kidney | Tumor | Obesity | Total Disease |
|---------------|--------------|---------|--------|--------|-------|---------|---------------|
| C1            | MOC5-O4-1-9  | -       | -      | -      | -     | -       |               |
| C2            | MOC5-O4-1-10 | -       | +      | +      | -     | -       | 2             |
| C3            | MOC5-O4-1-11 | -       | -      | -      | -     | +       | 1             |
| C4            | MOC5-O4-1-12 | -       | -      | +      | -     | -       | 1             |
| C5            | MOC4-O4-2-9  | -       | -      | -      | -     | -       |               |
| C6            | MOC4-O4-2-10 | -       | -      | -      | -     | -       |               |
| C7            | MOC4-O4-2-11 | -       | -      | -      | -     | -       |               |
| C8            | MOC4-O4-2-12 | -       | -      | -      | -     | -       |               |
| C9            | MOC4-O4-2-13 | -       | +      | -      | -     | -       | 1             |
| C10           | MOC7-O4-3-6  | -       | -      | +      | -     | +       | 2             |
| C11           | MOC7-O4-3-7  | -       | -      | +      | -     | -       | 1             |
| C12           | MOC7-O4-3-8  | -       | -      | -      | -     | +       | 1             |
| C13           | MOC7-O4-3-9  | -       | -      | +      | -     | -       | 1             |
| C14           | MOC7-O4-3-11 | -       | -      | -      | -     | +       | 1             |
| C15           | MOC8-O4-4-5  | -       | -      | -      | -     | +       | 1             |
| C16           | MOC8-O4-4-6  | -       | -      | -      | -     | +       | 1             |
| C17           | MOC2-O4-5-10 | -       | -      | +      | -     | -       | 1             |
| C18           | MOC2-O4-5-11 | -       | -      | +      | -     | -       | 1             |
| C19           | MOC1-O4-6-5  | -       | -      | +      | -     | +       | 2             |
| C20           | MOC1-O4-6-6  | -       | -      | +      | -     | -       | 1             |
| C21           | MOC1-O4-6-7  | -       | -      | +      | -     | -       | 1             |
| C22           | MOC1-O4-6-8  | -       | -      | -      | -     | +       | 1             |
| C23           | MOC1-O4-6-9  | -       | -      | -      | -     | +       | 1             |
| C24           | MOC1-O4-6-10 | -       | -      | -      | -     | +       | 1             |
| C25           | MOC6-O4-7-6  | -       | -      | +      | -     | -       | 1             |
| C26           | MOC6-O4-7-7  | -       | -      | -      | -     | +       | 1             |
| C27           | MOC6-O4-7-8  | -       | -      | -      | -     | +       | 1             |
| C28           | MOC6-O4-7-9  | -       | -      | +      | -     | -       | 1             |
| C29           | MOC6-O4-7-10 | -       | -      | -      | -     | -       |               |

| Serial Number | Rat ID        | Puberty | Testis | Kidney | Tumor | Obesity | Total Disease |
|---------------|---------------|---------|--------|--------|-------|---------|---------------|
| LD1           | MOLD9-O4-1-9  | -       | +      | -      | -     | +       | 2             |
| LD2           | MOLD9-O4-1-10 | -       | -      | +      | -     | +       | 2             |
| LD3           | MOLD9-O4-1-11 | -       | -      | +      | -     | -       | 1             |
| LD4           | MOLD2-O4-2-8  | -       | -      | +      | -     | +       | 2             |
| LD5           | MOLD2-O4-2-9  | -       | -      | +      | -     | -       | 1             |
| LD6           | MOLD2-O4-2-10 | -       | -      | +      | -     | +       | 2             |
| LD7           | MOLD2-O4-2-11 | -       | -      | +      | -     | +       | 2             |
| LD8           | MOLD2-O4-2-12 | -       | -      | +      | -     | -       | 1             |
| LD9           | MOLD3-O4-3-8  | -       | -      | +      | -     | -       | 1             |
| LD10          | MOLD3-O4-3-9  | -       | -      | +      | -     | -       | 1             |
| LD11          | MOLD3-O4-3-10 | -       | +      | +      | -     | -       | 2             |

|      |              |   |   |   |   |   |   |
|------|--------------|---|---|---|---|---|---|
| LD12 | MOLD1-O4-4-7 | - | + | + | - | - | 2 |
| LD13 | MOLD1-O4-4-8 | - | + | + | - | + | 3 |
| LD14 | MOLD1-O4-4-9 | - | - | - | - | + | 1 |
| LD15 | MOLD8-O4-5-6 | - | - | + | - | + | 2 |
| LD16 | MOLD8-O4-5-7 | - |   |   | - | + | 1 |
| LD17 | MOLD8-O4-5-8 | - |   |   | - | + | 1 |

A '+' indicates the presence; A '-' indicates the absence of disease; A blank cell indicates 'not determined.' Animal IDs with a 'C' belong to Control group, those with a 'LD' belong to lower dose DDT group. See 'Materials and Methods' section for disease assessment in rats. The number of animals per litter (litter representation) mean  $\pm$  SEM used for each specific disease/abnormality assessment within the control or lower dose DDT lineages were not found to be statistically different ( $p > 0.05$ ), so no litter bias detected.
