# Supplementary material for: Ancestral dichlorodiphenyltrichloroethane (DDT) exposure promotes epigenetic transgenerational inheritance of obesity
Source: PubMed Central journal article supplement (PMC3853586; doi:10.1186/1741-7015-11-228), 2013-10-23
Supplement: 1741-7015-11-228-S7.pdf [file 1741-7015-11-228-S7.pdf]

### Supplemental Table S5A.

Individual disease incidence in F4 generation Reverse Outcross female rats of Control and Lower Dose DDT lineages.

| Serial Number | Rat ID        | Puberty | Ovary | Uterus | Kidney | Tumor | Obesity | Total Disease |
|---------------|---------------|---------|-------|--------|--------|-------|---------|---------------|
| C1            | MCCGG1-R4-1-1 | -       | -     | -      | -      | -     | -       |               |
| C2            | MCCGG1-R4-1-2 | -       | -     | -      | -      | -     | -       |               |
| C3            | MCCGG1-R4-1-3 | -       | -     | +      | -      | -     | -       | 1             |
| C4            | MCTT2-R4-2-1  | -       | -     | +      | -      | -     | +       | 2             |
| C5            | MCTT2-R4-2-2  | -       | -     | +      | -      | -     | +       | 2             |
| C6            | MCTT2-R4-2-4  | -       |       | +      |        | -     | -       | 1             |
| C7            | MCTT2-R4-2-5  | -       |       | +      |        | -     | -       | 1             |
| C8            | MCWW0-R4-3-1  | -       | +     | -      |        | -     | +       | 2             |
| C9            | MCWW0-R4-3-2  | -       |       | +      |        | -     | +       | 2             |
| C10           | MCGG1-R4-4-1  | +       | -     | -      | -      | -     | -       | 1             |
| C11           | MCGG1-R4-4-2  | +       | -     | -      | -      | -     | -       | 1             |
| C12           | MCGG1-R4-4-3  | -       | -     | +      | -      | -     | -       | 1             |
| C13           | MCAA0-R4-5-1  | -       | -     | -      | -      | -     | -       |               |
| C14           | MCAA0-R4-5-2  | -       | -     | -      | -      | -     | -       |               |
| C15           | MCGG1-R4-6-1  | -       | -     | +      | +      | -     | -       | 2             |
| C16           | MCGG1-R4-6-2  | -       | -     | -      | -      | -     | -       |               |
| C17           | MCGG1-R4-6-3  | -       | -     | -      | -      | -     | -       |               |
| C18           | MCGG2-R4-7-1  | -       | -     | -      | +      | -     | -       | 1             |
| C19           | MCGG2-R4-7-2  | -       | -     | -      | +      | -     | -       | 1             |

| Serial Number | Rat ID        | Puberty | Ovary | Uterus | Kidney | Tumor | Obesity | Total Disease |
|---------------|---------------|---------|-------|--------|--------|-------|---------|---------------|
| LD1           | MLDLL2-R4-2-1 | -       | -     | -      | +      | -     | -       | 1             |
| LD2           | MLDLL2-R4-2-2 | -       | -     | -      | -      | -     | -       |               |
| LD3           | MLDLL2-R4-2-3 | -       | +     | -      | -      | -     | -       | 1             |
| LD4           | MLDLL2-R4-2-4 | -       | +     | -      | -      | -     | -       | 1             |
| LD5           | MLDRR1-R4-3-1 | -       | +     | -      | +      | -     | -       | 2             |
| LD6           | MLDRR1-R4-3-2 | -       | +     | -      | +      | -     | -       | 2             |
| LD7           | MLDHH0-R4-4-1 | -       | +     | +      |        | -     | -       | 2             |
| LD8           | MLDHH0-R4-4-2 | -       |       | +      |        | -     | -       | 1             |
| LD9           | MLDJJ2-R4-5-1 | -       | -     | -      | +      | -     | -       | 1             |
| LD10          | MLDJJ2-R4-5-2 | -       | +     | -      | -      | -     | -       | 1             |
| LD11          | MLDJJ2-R4-5-3 | -       | -     | -      | -      | -     | -       |               |
| LD12          | MLDJJ2-R4-5-4 | -       | -     | -      | -      | -     | -       |               |
| LD13          | MLDJJ2-R4-5-5 | -       | -     | -      | +      | -     | -       | 1             |
| LD14          | MLDKK0-R4-6-3 | -       |       | -      |        | -     | +       | 1             |
| LD15          | MLDJJ2-R4-7-1 | -       | +     | +      | +      | -     | -       | 3             |
| LD16          | MLDLL2-R4-8-1 | -       | -     | -      | -      | -     | +       | 1             |
| LD17          | MLDLL2-R4-8-2 | -       | +     | -      | +      | -     | +       | 3             |
| LD18          | MLDLL2-R4-8-3 | -       |       | -      |        | -     | +       | 1             |
| LD19          | MLDLL2-R4-8-4 | -       |       | -      |        | -     | +       | 1             |

A '+' indicates the presence; A '-' indicates the absence of disease; A blank cell indicates 'not determined.' Animal IDs with a 'C' belong to Control group, those

with a 'LD' belong to lower dose DDT group. See 'Materials and Methods' section for disease assessment in rats. The number of animals per litter (litter representation) mean  $\pm$  SEM used for each specific disease/abnormality assessment within the control or lower dose DDT lineages were not found to be statistically different ( $p > 0.05$ ), so no litter bias detected.

**Supplemental Table S5B.**

Individual disease incidence in F4 generation Reverse Outcross male rats of Control and Lower Dose DDT lineages.

| Serial Number | Rat ID        | Puberty | Testis | Kidney | Tumor | Obesity | Total Disease |
|---------------|---------------|---------|--------|--------|-------|---------|---------------|
| C1            | MCTT2-R4-2-9  | -       |        | +      | -     | -       | 1             |
| C2            | MCWW0-R4-3-4  | -       | -      | -      | -     | -       |               |
| C3            | MCWW0-R4-3-5  | -       | -      | -      | -     | -       |               |
| C4            | MCWW0-R4-3-6  | -       | -      | +      | -     | -       | 1             |
| C5            | MCWW0-R4-3-7  | -       | -      | -      | -     | -       |               |
| C6            | MCWW0-R4-3-8  | -       | +      | -      | -     | -       | 1             |
| C7            | MCWW0-R4-3-9  | -       | -      | -      | -     | -       |               |
| C8            | MCGG1-R4-4-6  | -       | -      | -      | -     | -       |               |
| C9            | MCGG1-R4-4-7  | -       | -      | -      | -     | -       |               |
| C10           | MCGG1-R4-4-8  | -       | -      | -      | -     | -       |               |
| C11           | MCGG1-R4-4-10 | -       | -      | -      | -     | -       |               |
| C12           | MCGG1-R4-4-11 | -       | -      | -      | -     | -       |               |
| C13           | MCGG1-R4-4-12 | -       | -      | +      | -     | -       | 1             |
| C14           | MCGG1-R4-6-8  | -       |        | +      | -     | -       | 1             |
| C15           | MCGG1-R4-6-9  | -       |        |        | -     | +       | 1             |
| C16           | MCGG2-R4-7-4  | -       |        | +      | -     | -       | 1             |
| C17           | MCGG2-R4-7-6  | -       | -      | +      | -     | -       | 1             |
| C18           | MCGG2-R4-7-7  | -       | -      | +      | -     | -       | 1             |
| C19           | MCGG2-R4-7-8  | -       | -      | +      | -     | -       | 1             |

| Serial Number | Rat ID         | Puberty | Testis | Kidney | Tumor | Obesity | Total Disease |
|---------------|----------------|---------|--------|--------|-------|---------|---------------|
| LD1           | MLDLL2-R4-1-2  | -       | -      | +      | -     | -       | 1             |
| LD2           | MLDLL2-R4-2-8  | -       | +      | -      | -     | +       | 2             |
| LD3           | MLDLL2-R4-2-9  | -       | +      | +      | -     | -       | 2             |
| LD4           | MLDRR1-R4-3-5  | -       |        |        | -     | +       | 1             |
| LD5           | MLDRR1-R4-3-7  | -       | -      | +      | -     | -       | 1             |
| LD6           | MLDRR1-R4-3-9  | -       | -      | +      | -     | -       | 1             |
| LD7           | MLDRR1-R4-3-10 | -       | -      | +      | -     | +       | 2             |
| LD8           | MLDHH0-R4-4-5  | -       | -      | +      | -     | +       | 2             |
| LD9           | MLDJJ2-R4-5-8  | -       | -      | -      | -     | +       | 1             |
| LD10          | MLDJJ2-R4-5-9  | -       | +      | +      | -     | -       | 2             |
| LD11          | MLDJJ2-R4-5-10 | -       | -      | +      | -     | -       | 1             |
| LD12          | MLDKK0-R4-6-6  | -       |        |        | -     | +       | 1             |
| LD13          | MLDKK0-R4-6-7  | -       | -      | +      | -     | +       | 2             |
| LD14          | MLDKK0-R4-6-8  | -       | -      | +      | -     | +       | 2             |
| LD15          | MLDJJ2-R4-7-2  | -       | +      | -      | -     | +       | 2             |
| LD16          | MLDJJ2-R4-7-3  | -       | -      | +      | -     | +       | 2             |
| LD17          | MLDJJ2-R4-7-4  | -       |        |        | -     | +       | 1             |
| LD18          | MLDJJ2-R4-7-5  | -       |        |        | -     | +       | 1             |
| LD19          | MLDLL2-R4-8-7  | -       | +      | +      | -     | -       | 2             |
| LD20          | MLDLL2-R4-8-9  | -       |        |        | -     | +       | 1             |
| LD21          | MLDLL2-R4-8-10 | -       |        |        | -     | +       | 1             |

---

|      |                |   |   |   |   |
|------|----------------|---|---|---|---|
| LD22 | MLDLL2-R4-8-11 | - | - | + | 1 |
|------|----------------|---|---|---|---|

---

A '+' indicates the presence; A '-' indicates the absence of disease; A blank cell indicates 'not determined.' Animal IDs with a 'C' belong to Control group, those with a 'LD' belong to lower dose DDT group. See 'Materials and Methods' section for disease assessment in rats. The number of animals per litter (litter representation) mean  $\pm$  SEM used for each specific disease/abnormality assessment within the control or lower dose DDT lineages were not found to be statistically different ( $p > 0.05$ ), so no litter bias detected.
