# Supplementary material for: Ancestral dichlorodiphenyltrichloroethane (DDT) exposure promotes epigenetic transgenerational inheritance of obesity
Source: PubMed Central journal article supplement (PMC3853586; doi:10.1186/1741-7015-11-228), 2013-10-23
Supplement: 1741-7015-11-228-S8.pdf [file 1741-7015-11-228-S8.pdf]

## Supplemental Table S6.

### DDT induced F3 generation sperm differential DNA methylation regions (DMR) (Intersection)

| Gene Symbol       | Chr       | Start            | End              | Gene ID       | Min P Value     | Gene Title                                                   |
|-------------------|-----------|------------------|------------------|---------------|-----------------|--------------------------------------------------------------|
| <b>Znf575</b>     | <b>1</b>  | <b>79870298</b>  | <b>79872347</b>  | <b>308430</b> | <b>3.69E-23</b> | <b>Zinc finger protein 575</b>                               |
| <b>Trpm4</b>      | <b>1</b>  | <b>95802352</b>  | <b>95803340</b>  | <b>171143</b> | <b>1.16E-09</b> | <b>Transient receptor potential cation channel</b>           |
| Tsku              | 1         | 155621758        | 155622558        | 308843        | 7.75E-19        | Tsukushin                                                    |
| <b>Sfxn3</b>      | <b>1</b>  | <b>250111583</b> | <b>250112379</b> | <b>65042</b>  | <b>9.44E-08</b> | <b>Sideroflexin 3</b>                                        |
| <b>Prkaa1</b>     | <b>2</b>  | <b>54327367</b>  | <b>54328344</b>  | <b>65248</b>  | <b>1.83E-20</b> | <b>Protein kinase</b>                                        |
| <b>Fxr1</b>       | <b>2</b>  | <b>120329766</b> | <b>120330481</b> | <b>361927</b> | <b>3.19E-14</b> | <b>Fragile X mental retardation</b>                          |
| <b>Bglap</b>      | <b>2</b>  | <b>180484821</b> | <b>180487344</b> | <b>25295</b>  | <b>8.96E-32</b> | <b>Bone gamma-carboxyglutamate (gla) protein</b>             |
| <b>Ppp6c</b>      | <b>3</b>  | <b>18997054</b>  | <b>18997654</b>  | <b>171121</b> | <b>3.92E-18</b> | <b>Protein phosphatase 6</b>                                 |
| <b>Epc2</b>       | <b>3</b>  | <b>30420205</b>  | <b>30420805</b>  | <b>362132</b> | <b>4.26E-10</b> | <b>Enhancer of polycomb homolog 2 (Drosophila)</b>           |
| <b>Meis2</b>      | <b>3</b>  | <b>102118424</b> | <b>102119024</b> | <b>311311</b> | <b>7.46E-13</b> | <b>Meis homeobox 2</b>                                       |
| <b>Rps21</b>      | <b>3</b>  | <b>169311014</b> | <b>169311614</b> | <b>81775</b>  | <b>4.56E-09</b> | <b>Ribosomal protein S21</b>                                 |
| Clstn3            | 4         | 160664554        | 160666152        | 171393        | 7.21E-08        | Calsyntenin 3                                                |
| <b>Hcrtr1</b>     | <b>5</b>  | <b>149170407</b> | <b>149171007</b> | <b>25593</b>  | <b>1.51E-09</b> | <b>Hypocretin (orexin) receptor 1</b>                        |
| Npc2              | 6         | 108815006        | 108815815        | 286898        | 9.44E-10        | Niemann-Pick disease                                         |
| Itga7             | 7         | 2230364          | 2231454          | 81008         | 4.37E-10        | Integrin                                                     |
| Grina             | 7         | 114277354        | 114278461        | 266668        | 1.21E-10        | Glutamate receptor                                           |
| <b>L3mbtl2</b>    | <b>7</b>  | <b>120014365</b> | <b>120015355</b> | <b>300320</b> | <b>1.63E-11</b> | <b>L(3)mbt-like 2 (Drosophila)</b>                           |
| Carm1             | 8         | 20649612         | 20650307         | 363026        | 1.78E-19        | Coactivator-associated arginine methyltransferase 1          |
| <b>Rgl3</b>       | <b>8</b>  | <b>21092037</b>  | <b>21092637</b>  | <b>300444</b> | <b>1.10E-07</b> | <b>Ral guanine nucleotide dissociation stimulator-like 3</b> |
| <b>Pigb</b>       | <b>8</b>  | <b>77794848</b>  | <b>77795448</b>  | <b>315807</b> | <b>3.48E-24</b> | <b>Phosphatidylinositol glycan anchor biosynthesis</b>       |
| Klhdc3            | 9         | 10052217         | 10053207         | 363192        | 5.74E-10        | Kelch domain containing 3                                    |
| <b>Sema4c</b>     | <b>9</b>  | <b>35501103</b>  | <b>35501703</b>  | <b>301346</b> | <b>1.13E-06</b> | <b>Sema domain</b>                                           |
| <b>RGD1306625</b> | <b>10</b> | <b>17693855</b>  | <b>17694455</b>  | <b>360508</b> | <b>1.91E-07</b> | <b>Loc360508</b>                                             |
| <b>Leap2</b>      | <b>10</b> | <b>38883617</b>  | <b>38884542</b>  | <b>497901</b> | <b>7.72E-12</b> | <b>Liver-expressed antimicrobial peptide 2</b>               |
| Efnb3             | 10        | 56379485         | 56380383         | 360546        | 1.23E-10        | Ephrin B3                                                    |
| <b>Fam134c</b>    | <b>10</b> | <b>90138165</b>  | <b>90138765</b>  | <b>360632</b> | <b>2.49E-08</b> | <b>Family with sequence similarity 134</b>                   |
| Sgsm1             | 12        | 44329558         | 44330263         | 288743        | 3.50E-21        | Small G protein signaling modulator 1                        |
| <b>Slc4a4</b>     | <b>14</b> | <b>20738777</b>  | <b>20739572</b>  | <b>84484</b>  | <b>1.11E-18</b> | <b>Solute carrier family 4 (anion exchanger)</b>             |
| <b>Selm</b>       | <b>14</b> | <b>84159679</b>  | <b>84160888</b>  | <b>498398</b> | <b>3.90E-15</b> | <b>Selenoprotein M</b>                                       |
| Mtmt7             | 16        | 54982063         | 54982663         | 306490        | 4.13E-13        | Myotubularin related protein 7                               |
| Hist1h2bn         | 17        | 50352153         | 50352753         | 291157        | 9.04E-17        | Histone cluster 1                                            |
| <b>Snrpd1</b>     | <b>18</b> | <b>2001020</b>   | <b>2001620</b>   | <b>291794</b> | <b>2.44E-19</b> | <b>Small nuclear ribonucleoprotein D1</b>                    |
| <b>Cklf</b>       | <b>19</b> | <b>663953</b>    | <b>664553</b>    | <b>245978</b> | <b>2.04E-08</b> | <b>Chemokine-like factor</b>                                 |
| Siah1a            | 19        | 21716960         | 21717780         | 140941        | 7.78E-12        | Seven in absentia 1A                                         |
| <b>Tubb3</b>      | <b>19</b> | <b>53742902</b>  | <b>53743830</b>  | <b>246118</b> | <b>9.53E-10</b> | <b>Tubulin</b>                                               |
| <b>RT1-CE5</b>    | <b>20</b> | <b>3513158</b>   | <b>3513758</b>   | <b>309607</b> | <b>4.95E-11</b> | <b>RT1 class I</b>                                           |
| <b>Vps52</b>      | <b>20</b> | <b>5083014</b>   | <b>5084511</b>   | <b>25218</b>  | <b>4.19E-09</b> | <b>Vacuolar protein sorting 52 homolog (S. Cerevisiae)</b>   |
| <b>AA926063</b>   | <b>20</b> | <b>5139498</b>   | <b>5140597</b>   | <b>294284</b> | <b>6.22E-30</b> | <b>Aa926063gene</b>                                          |
| <b>Ptges3l1</b>   | <b>X</b>  | <b>63914478</b>  | <b>63915574</b>  | <b>367808</b> | <b>1.88E-09</b> | <b>Prostaglandin E synthase 3-like 1</b>                     |

Epimutations found in F3-generation sperm after exposure of F0 generation gestating females to DDT, obtained by intersection of the results of three MeDIP-Chip comparative hybridizations. The bolded genes were found to be unique DMR associated only with DDT induced DMR.
