# Supplementary material for: Ancestral dichlorodiphenyltrichloroethane (DDT) exposure promotes epigenetic transgenerational inheritance of obesity
Source: PubMed Central journal article supplement (PMC3853586; doi:10.1186/1741-7015-11-228), 2013-10-23
Supplement: 1741-7015-11-228-S9.pdf [file 1741-7015-11-228-S9.pdf]

**Supplemental Table S7.****DDT induced F3 generation sperm differential DNA methylation regions (DMR) (Average)**

| Gene Symbol | Chr | Start     | End       | Gene ID | Min P Value | Gene Title                                          |
|-------------|-----|-----------|-----------|---------|-------------|-----------------------------------------------------|
| RGD1565772  | 1   | 67650634  | 67651234  | 308341  | 2.26E-06    | Similar to hypothetical protein A430110N23          |
| Kptn        | 1   | 76460071  | 76460966  | 308107  | 1.88E-07    | Kaptin (actin binding protein)                      |
| Dmpk        | 1   | 78450672  | 78451272  | 308405  | 8.74E-07    | Dystrophia myotonica-protein kinase                 |
| Plaur       | 1   | 79705421  | 79706021  | 50692   | 6.94E-06    | Plasminogen activator                               |
| Znf575      | 1   | 79870598  | 79872243  | 308430  | 2.34E-17    | Zinc finger protein 575                             |
| Ethe1       | 1   | 79875744  | 79876439  | 292710  | 4.22E-07    | Ethylmalonic encephalopathy 1                       |
| Cyp2t1      | 1   | 82230254  | 82230854  | 171380  | 3.49E-06    | Cytochrome P450                                     |
| Fxyd5       | 1   | 86084554  | 86085239  | 60338   | 2.19E-06    | FXYD domain-containing ion transport regulator 5    |
| Klk8        | 1   | 94226280  | 94226880  | 308565  | 2.02E-07    | Kallikrein related-peptidase 8                      |
| Tbc1d17     | 1   | 95321318  | 95322308  | 292886  | 3.35E-06    | TBC1 domain family                                  |
| Ap2a1       | 1   | 95403348  | 95403948  | 308578  | 9.46E-06    | Adaptor-related protein complex 2                   |
| Rpl13a      | 1   | 95603462  | 95604158  | 317646  | 6.12E-06    | Ribosomal protein L13A                              |
| Trpm4       | 1   | 95802352  | 95803340  | 171143  | 1.35E-11    | Transient receptor potential cation channel         |
| Hrc         | 1   | 95809421  | 95810100  | 292905  | 2.92E-07    | Histidine rich calcium binding protein              |
| Ruvbl2      | 1   | 95907092  | 95907692  | 292907  | 1.40E-06    | Ruvb-like 2 (E. Coli)                               |
| Sult2b1     | 1   | 96264519  | 96265219  | 292915  | 6.62E-06    | Sulfotransferase family                             |
| Fah         | 1   | 140875586 | 140876369 | 29383   | 8.39E-06    | Fumarylacetoacetate hydrolase                       |
| Tsku        | 1   | 155621758 | 155622558 | 308843  | 4.07E-21    | Tsukushin                                           |
| Serpinh1    | 1   | 156673272 | 156674075 | 29345   | 1.54E-06    | Serine (or cysteine) peptidase inhibitor            |
| Pde2a       | 1   | 158951586 | 158952186 | 81743   | 1.24E-07    | Phosphodiesterase 2A                                |
| Aqp8        | 1   | 182331155 | 182331845 | 29172   | 2.72E-06    | Aquaporin 8                                         |
| RGD1305592  | 1   | 186199558 | 186200158 | 293500  | 3.58E-07    | Similar to RIKEN cDNA 2900092E17                    |
| Bet1l       | 1   | 201012554 | 201013527 | 54400   | 3.14E-06    | Blocked early in transport 1 homolog                |
| Pnpla2      | 1   | 201642430 | 201643110 | 361676  | 9.81E-06    | Patatin-like phospholipase domain containing 2      |
| Actn3       | 1   | 207491443 | 207492749 | 171009  | 1.95E-06    | Actinin alpha 3                                     |
| Prdx5       | 1   | 209586342 | 209587138 | 113898  | 1.13E-12    | Peroxiredoxin 5                                     |
| Loxl4       | 1   | 248268364 | 248269065 | 309380  | 1.11E-07    | Lysyl oxidase-like 4                                |
| Sfxn3       | 1   | 250111583 | 250112503 | 65042   | 8.87E-09    | Sideroflexin 3                                      |
| Ccno        | 2   | 44376971  | 44377571  | 499528  | 7.78E-08    | Cyclin O                                            |
| Prkaa1      | 2   | 54327367  | 54328264  | 65248   | 8.10E-09    | Protein kinase                                      |
| Fxr1        | 2   | 120329766 | 120330366 | 361927  | 5.04E-07    | Fragile X mental retardation                        |
| Muc1        | 2   | 181399893 | 181400493 | 24571   | 1.38E-07    | Mucin 1                                             |
| Kcnn3       | 2   | 181715841 | 181716441 | 54263   | 3.15E-06    | Potassium /calcium-activated channel                |
| Mov10       | 2   | 200075591 | 200076191 | 310756  | 5.97E-06    | Moloney leukemia virus 10                           |
| Gstm1       | 2   | 203580702 | 203581302 | 24423   | 6.54E-06    | Glutathione S-transferase mu 1                      |
| Extl2       | 2   | 212162933 | 212163821 | 310803  | 1.19E-06    | Exostoses (multiple)-like 2                         |
| Dkk2        | 2   | 229541108 | 229541708 | 295445  | 4.25E-06    | Dickkopf homolog 2 (Xenopus laevis)                 |
| Cyr61       | 2   | 243826123 | 243826723 | 83476   | 3.92E-06    | Cysteine-rich                                       |
| Ndor1       | 3   | 3420722   | 3421402   | 311799  | 2.09E-07    | NADPH dependent diflavin oxidoreductase 1           |
| Zdhhc12     | 3   | 9099292   | 9099892   | 366014  | 3.16E-06    | Zinc finger                                         |
| Ppp6c       | 3   | 18997054  | 18997654  | 171121  | 2.50E-11    | Protein phosphatase 6                               |
| Epc2        | 3   | 30420205  | 30420805  | 362132  | 8.61E-07    | Enhancer of polycomb homolog 2 (Drosophila)         |
| Wipf1       | 3   | 56002074  | 56002870  | 117538  | 2.32E-06    | WAS/WASL interacting protein family                 |
| Lrrc55      | 3   | 68429303  | 68429903  | 311171  | 7.74E-06    | Leucine rich repeat containing 55                   |
| Arfgap2     | 3   | 75620106  | 75620706  | 362162  | 5.38E-06    | ADP-ribosylation factor gtpase activating protein 2 |

|            |   |           |           |        |          |                                                |
|------------|---|-----------|-----------|--------|----------|------------------------------------------------|
| Chrm4      | 3 | 76302545  | 76303245  | 25111  | 7.84E-08 | Cholinergic receptor                           |
| Gylt1b     | 3 | 76768724  | 76769324  | 311202 | 4.26E-06 | Glycosyltransferase-like 1B                    |
| Aqr        | 3 | 100034436 | 100035036 | 366163 | 6.11E-06 | Aquarius homolog (mouse)                       |
| Meis2      | 3 | 102118424 | 102119024 | 311311 | 1.11E-06 | Meis homeobox 2                                |
| Cdan1      | 3 | 107508165 | 107508765 | 311348 | 5.72E-06 | Congenital dyserythropoietic anemia            |
| Sord       | 3 | 109012700 | 109013590 | 24788  | 1.13E-09 | Sorbitol dehydrogenase                         |
| Duox2      | 3 | 109076069 | 109076669 | 79107  | 1.38E-06 | Dual oxidase 2                                 |
| Cst3       | 3 | 137654243 | 137654843 | 25307  | 9.67E-06 | Cystatin C                                     |
| Slc32a1    | 3 | 149342639 | 149343525 | 83612  | 6.77E-09 | Solute carrier family 32 (GABA transporter)    |
| Spata2     | 3 | 158640784 | 158641479 | 114210 | 4.37E-12 | Spermatogenesis associated 2                   |
| Cyp24a1    | 3 | 161553464 | 161554064 | 25279  | 6.85E-06 | Cytochrome P450                                |
| Rps21      | 3 | 169311014 | 169311614 | 81775  | 5.96E-09 | Ribosomal protein S21                          |
| Ppdpf      | 3 | 170326330 | 170326930 | 296470 | 3.28E-06 | Pancreatic progenitor cell differentiation     |
| Slc4a2     | 4 | 6116769   | 6117673   | 24780  | 3.89E-07 | Solute carrier family 4 (anion exchanger)      |
| Impdh1     | 4 | 56086107  | 56086807  | 362329 | 2.69E-06 | IMP (inosine monophosphate) dehydrogenase 1    |
| Dok1       | 4 | 117244893 | 117245884 | 312477 | 1.19E-09 | Docking protein 1                              |
| Htra2      | 4 | 117264316 | 117265101 | 297376 | 2.08E-09 | Htra serine peptidase 2                        |
| Pcgf1      | 4 | 117290323 | 117291507 | 312480 | 4.55E-07 | Polycomb group ring finger 1                   |
| Abtb1      | 4 | 122936708 | 122937308 | 297432 | 1.38E-06 | Ankyrin repeat and BTB (POZ) domain 1          |
| Gpr27      | 4 | 134542013 | 134542613 | 65275  | 1.59E-10 | G protein-coupled receptor 27                  |
| Ret        | 4 | 154491475 | 154492462 | 24716  | 1.46E-06 | Ret proto-oncogene                             |
| Clstn3     | 4 | 160665062 | 160665757 | 171393 | 3.18E-06 | Calsyntenin 3                                  |
| Gapdh      | 4 | 161284964 | 161285858 | 24383  | 3.54E-09 | Glyceraldehyde-3-phosphate dehydrogenase       |
| Ntf3       | 4 | 162506324 | 162506924 | 81737  | 5.85E-06 | Neurotrophin 3                                 |
| Kcna1      | 4 | 163015524 | 163016204 | 24520  | 3.95E-07 | Potassium voltage-gated channel                |
| Csda       | 4 | 169099521 | 169100121 | 83807  | 2.43E-09 | Cold shock domain protein A                    |
| Tuba8      | 4 | 1634530   | 1635405   | 500377 | 9.66E-07 | Tubulin                                        |
| RGD1309821 | 5 | 58926895  | 58927782  | 366360 | 2.56E-07 | Similar to KIAA1161 protein                    |
| Sit1       | 5 | 59964375  | 59965190  | 500449 | 3.11E-07 | Signaling threshold transmembrane adaptor 1    |
| Nipsnap3b  | 5 | 70448849  | 70449561  | 313211 | 6.19E-12 | Nipsnap homolog 3B (C. Elegans)                |
| Pole3      | 5 | 79520387  | 79520987  | 298098 | 8.74E-08 | Polymerase (DNA directed)                      |
| Kank4      | 5 | 119232056 | 119232656 | 313385 | 7.01E-07 | KN motif and ankyrin repeat domains 4          |
| Faah       | 5 | 136310905 | 136312105 | 29347  | 1.69E-11 | Fatty acid amide hydrolase                     |
| Cdc20      | 5 | 138916520 | 138917300 | 64515  | 3.00E-06 | Cell division cycle 20 homolog (S. Cerevisiae) |
| Hcrtr1     | 5 | 149170407 | 149171007 | 25593  | 3.11E-11 | Hypocretin (orexin) receptor 1                 |
| Mrto4      | 5 | 158154393 | 158155393 | 298586 | 5.13E-09 | Mrna turnover 4 homolog (S. Cerevisiae)        |
| Efh2       | 5 | 160776270 | 160776955 | 298609 | 9.13E-10 | EF-hand domain family                          |
| Pik3cd     | 5 | 166762948 | 166763658 | 366508 | 3.83E-06 | Phosphoinositide-3-kinase                      |
| Cyp1b1     | 6 | 2552849   | 2553544   | 25426  | 4.60E-06 | Cytochrome P450                                |
| Rhoq       | 6 | 10413845  | 10414445  | 85428  | 1.58E-09 | Ras homolog gene family                        |
| Slc30a3    | 6 | 25256014  | 25256614  | 366568 | 3.96E-06 | Solute carrier family 30 (zinc transporter)    |
| Dnmt3a     | 6 | 26859684  | 26860575  | 444984 | 1.24E-06 | DNA (cytosine-5-)-methyltransferase 3 alpha    |
| Adcy3      | 6 | 27118646  | 27119246  | 64508  | 8.81E-06 | Adenylate cyclase 3                            |
| Pygl       | 6 | 92340804  | 92341404  | 64035  | 5.01E-06 | Phosphorylase                                  |
| Hspa2      | 6 | 99000603  | 99001203  | 60460  | 3.37E-06 | Heat shock protein alpha 2                     |
| Rdh11      | 6 | 101962268 | 101962868 | 362757 | 4.62E-06 | Retinol dehydrogenase 11                       |
| Npc2       | 6 | 108815006 | 108815815 | 286898 | 5.94E-07 | Niemann-Pick disease                           |
| Batf       | 6 | 109793090 | 109794280 | 299206 | 3.23E-09 | Basic leucine zipper transcription factor      |
| Esrrb      | 6 | 110585981 | 110586661 | 299210 | 2.93E-07 | Estrogen-related receptor beta                 |

|            |    |           |           |        |          |                                                     |
|------------|----|-----------|-----------|--------|----------|-----------------------------------------------------|
| Ckb        | 6  | 136459281 | 136459966 | 24264  | 6.06E-06 | Creatine kinase                                     |
| Trmt61a    | 6  | 136460561 | 136461161 | 314462 | 4.72E-06 | Trna methyltransferase 61 homolog A                 |
| Akt1       | 6  | 137660231 | 137661023 | 24185  | 1.56E-08 | V-akt murine thymoma viral oncogene homolog 1       |
| Itga7      | 7  | 2230364   | 2231454   | 81008  | 4.77E-09 | Integrin                                            |
| Pip5k1c    | 7  | 9908530   | 9909318   | 314641 | 3.21E-07 | Phosphatidylinositol-4-phosphate 5-kinase           |
| Hcn2       | 7  | 11503885  | 11504585  | 114244 | 1.30E-07 | Hyperpolarization activated cyclic nucleotide-gated |
| Ccdc53     | 7  | 24894041  | 24894825  | 299707 | 2.79E-06 | Coiled-coil domain containing 53                    |
| Geft       | 7  | 67143342  | 67144162  | 314904 | 5.01E-06 | Rhoa/RAC/CDC42 exchange factor                      |
| Ddit3      | 7  | 67247684  | 67248284  | 29467  | 1.67E-07 | DNA-damage inducible transcript 3                   |
| Eif3h      | 7  | 88154143  | 88154743  | 299899 | 2.87E-06 | Eukaryotic translation initiation factor 3          |
| Grina      | 7  | 114277354 | 114278461 | 266668 | 7.23E-12 | Glutamate receptor                                  |
| Fbxl6      | 7  | 114590568 | 114591268 | 362941 | 1.10E-06 | F-box and leucine-rich repeat protein 6             |
| L3mbtl2    | 7  | 120013411 | 120014965 | 300320 | 3.48E-06 | L(3)mbt-like 2 (Drosophila)                         |
| Serhl2     | 7  | 121125849 | 121126559 | 500911 | 4.76E-08 | Serine hydrolase-like 2                             |
| Tubgcp6    | 7  | 127422817 | 127423417 | 362980 | 5.76E-06 | Tubulin                                             |
| Ccdc65     | 7  | 137475638 | 137476238 | 362994 | 5.34E-06 | Coiled-coil domain containing 65                    |
| Grasp      | 7  | 139968182 | 139968967 | 192254 | 7.69E-06 | GRP1 (general receptor for phosphoinositides 1)-    |
| Mfsd5      | 7  | 141033250 | 141033850 | 315329 | 4.03E-07 | Major facilitator superfamily domain containing 5   |
| Zfp385a    | 7  | 142249740 | 142250435 | 685474 | 3.74E-14 | Zinc finger protein 385A                            |
| Sesn3      | 8  | 11075535  | 11076545  | 315427 | 6.39E-16 | Sestrin 3                                           |
| Carm1      | 8  | 20649707  | 20650307  | 363026 | 4.16E-09 | Coactivator-assoc arginine methyltransferase 1      |
| Rgl3       | 8  | 21091844  | 21092637  | 300444 | 1.15E-08 | Ral guanine nuc dissociation stimulator-like 3      |
| Ccdc151    | 8  | 21106911  | 21107511  | 315465 | 6.07E-06 | Coiled-coil domain containing 151                   |
| Kcnj5      | 8  | 32104069  | 32104669  | 29713  | 5.00E-06 | Potassium inwardly-rectifying channel               |
| Ets1       | 8  | 32481718  | 32482437  | 24356  | 1.37E-07 | V-ets erythroblastosis virus E26 oncogene           |
| Kirrel3    | 8  | 34300842  | 34301624  | 315546 | 6.40E-11 | Kin of IRRE like 3 (Drosophila)                     |
| Bcl9l      | 8  | 47449901  | 47450616  | 300673 | 6.65E-07 | B-cell CLL/lymphoma 9-like                          |
| Usp28      | 8  | 52245410  | 52246190  | 315639 | 1.00E-08 | Ubiquitin specific peptidase 28                     |
| Pts        | 8  | 53890354  | 53890954  | 29498  | 6.05E-09 | 6-pyruvoyl-tetrahydropterin synthase                |
| Pstpip1    | 8  | 59693388  | 59694278  | 300732 | 1.08E-06 | Proline-serine-threonine phosphatase-interacting    |
| Lingo1     | 8  | 60353691  | 60354291  | 315691 | 1.14E-06 | Leucine rich repeat and Ig domain containing 1      |
| Rora       | 8  | 73052515  | 73053115  | 300807 | 3.85E-07 | RAR-related orphan receptor A                       |
| Pigb       | 8  | 77794848  | 77795448  | 315807 | 1.39E-10 | Phosphatidylinositol glycan anchor biosynthesis     |
| Grm2       | 8  | 111848912 | 111849992 | 24415  | 1.10E-08 | Glutamate receptor                                  |
| Tmie       | 8  | 115269500 | 115270189 | 501061 | 1.88E-08 | Transmembrane inner ear                             |
| Klhd3      | 9  | 10052217  | 10053207  | 363192 | 1.68E-10 | Kelch domain containing 3                           |
| Yip3       | 9  | 10298009  | 10298609  | 301245 | 3.93E-07 | Yip1 domain family                                  |
| Sema4c     | 9  | 35501103  | 35501993  | 301346 | 4.49E-07 | Sema domain                                         |
| Dnpep      | 9  | 74594494  | 74595372  | 301529 | 3.24E-06 | Aspartyl aminopeptidase                             |
| Itn2c      | 9  | 84611904  | 84612604  | 301575 | 4.73E-07 | Integral membrane protein 2C                        |
| Ecel1      | 9  | 85945765  | 85946448  | 60417  | 3.94E-08 | Endothelin converting enzyme-like 1                 |
| Lrrfp1     | 9  | 90277707  | 90278387  | 367314 | 1.00E-07 | Leucine rich repeat (in FLII) interacting protein 1 |
| Farp2      | 9  | 92791518  | 92792418  | 316639 | 4.65E-06 | Ferm                                                |
| Thoc6      | 10 | 12941568  | 12942463  | 79227  | 3.84E-09 | THO complex 6 homolog (Drosophila)                  |
| Fam173a    | 10 | 15058618  | 15060194  | 287150 | 4.33E-12 | Family with sequence similarity 173                 |
| RGD1306625 | 10 | 17693855  | 17694455  | 360508 | 1.65E-07 | Loc360508                                           |
| Adra1b     | 10 | 28946047  | 28946647  | 24173  | 1.74E-06 | Adrenergic                                          |
| Phf15      | 10 | 37379987  | 37380587  | 303113 | 3.96E-06 | PHD finger protein 15                               |
| Leap2      | 10 | 38883617  | 38884452  | 497901 | 2.79E-11 | Liver-expressed antimicrobial peptide 2             |

|            |    |           |           |        |          |                                                    |
|------------|----|-----------|-----------|--------|----------|----------------------------------------------------|
| Kdm6b      | 10 | 56203971  | 56205090  | 363630 | 6.09E-07 | Lysine (K)-specific demethylase 6B                 |
| Efnb3      | 10 | 56379485  | 56380383  | 360546 | 7.33E-13 | Ephrin B3                                          |
| Bcl6b      | 10 | 57068793  | 57069487  | 360551 | 1.59E-06 | B-cell CLL/lymphoma 6                              |
| RGD1308134 | 10 | 57077341  | 57078127  | 287452 | 5.66E-07 | Similar to RIKEN cdna 1110020A23                   |
| Pfn1       | 10 | 57534113  | 57534810  | 64303  | 1.35E-06 | Profilin 1                                         |
| Olr1512    | 10 | 61444527  | 61445127  | 287511 | 8.87E-07 | Olfactory receptor 1512                            |
| Flot2      | 10 | 64080542  | 64081256  | 83764  | 4.44E-06 | Flotillin 2                                        |
| Ksr1       | 10 | 65321023  | 65321623  | 360573 | 8.45E-06 | Kinase suppressor of ras 1                         |
| Abr        | 10 | 67617843  | 67618626  | 287537 | 1.21E-06 | Active BCR-related gene                            |
| Tbx2       | 10 | 74084425  | 74089738  | 303398 | 2.81E-09 | T-box 2                                            |
| Hoxb4      | 10 | 85050638  | 85051430  | 497988 | 9.82E-06 | Homeo box B4                                       |
| Psmb3      | 10 | 86452640  | 86453240  | 29676  | 7.60E-06 | Proteasome (prosome                                |
| Nr1d1      | 10 | 87547384  | 87548384  | 252917 | 4.34E-07 | Nuclear receptor subfamily 1                       |
| Krt24      | 10 | 88188780  | 88189657  | 287675 | 2.08E-10 | Keratin 24                                         |
| Kat2a      | 10 | 89651442  | 89652042  | 303539 | 9.32E-06 | K(lysine) acetyltransferase 2A                     |
| Fam134c    | 10 | 90138165  | 90138765  | 360632 | 1.54E-08 | Family with sequence similarity 134                |
| Brca1      | 10 | 90572480  | 90573080  | 497672 | 7.94E-08 | Breast cancer 1                                    |
| Smurf2     | 10 | 96269129  | 96269729  | 303614 | 5.23E-06 | SMAD specific E3 ubiquitin protein ligase 2        |
| Nat9       | 10 | 105260764 | 105261650 | 303669 | 3.86E-07 | N-acetyltransferase 9 (GCN5-related                |
| Ush1g      | 10 | 105399847 | 105400642 | 287819 | 1.54E-06 | Usher syndrome 1G homolog (human)                  |
| Caskin2    | 10 | 105914751 | 105915351 | 303678 | 1.79E-07 | Cask-interacting protein 2                         |
| Sectm1a    | 10 | 110295386 | 110296167 | 287885 | 1.52E-07 | Secreted and transmembrane 1A                      |
| RGD1310778 | 11 | 30708849  | 30709564  | 288272 | 6.59E-08 | Similar to Putative protein c21orf45               |
| Setd4      | 11 | 33788133  | 33788830  | 245975 | 2.46E-07 | SET domain containing 4                            |
| Pvrl3      | 11 | 55843915  | 55844515  | 288124 | 1.62E-06 | Poliovirus receptor-related 3                      |
| Abcf3      | 11 | 82581404  | 82582483  | 287982 | 3.00E-09 | ATP-binding cassette                               |
| Thap7      | 11 | 85474161  | 85474844  | 287944 | 6.27E-06 | THAP domain containing 7                           |
| Asmt       | 12 | 16816154  | 16816847  | 246281 | 6.90E-10 | Acetylserotonin O-methyltransferase                |
| Il3ra      | 12 | 16829845  | 16830445  | 246144 | 3.86E-09 | Interleukin 3 receptor                             |
| Mcm7       | 12 | 17614097  | 17614983  | 288532 | 3.69E-06 | Minichromosome component 7                         |
| Vgf        | 12 | 20901963  | 20902948  | 29461  | 5.74E-06 | VGF nerve growth factor inducible                  |
| Gtf2ird1   | 12 | 23319136  | 23319820  | 246770 | 5.42E-06 | GTF2I repeat domain containing 1                   |
| Slc24a6    | 12 | 37250073  | 37250673  | 498185 | 4.99E-07 | Solute carrier family 24 (sodium/potassium/calcium |
| Gltp       | 12 | 43194232  | 43194832  | 288707 | 8.37E-06 | Glycolipid transfer protein                        |
| Sgsm1      | 12 | 44329558  | 44330263  | 288743 | 8.30E-13 | Small G protein signaling modulator 1              |
| Tomm40b    | 13 | 87111588  | 87112502  | 304971 | 7.32E-08 | Translocase of outer mitochondrial membrane 40     |
| Ppox       | 13 | 87173617  | 87174403  | 289219 | 7.18E-08 | Protoporphyrinogen oxidase                         |
| Fgfr1      | 14 | 1564558   | 1565243   | 360903 | 1.61E-06 | Fibroblast growth factor receptor-like 1           |
| Slc4a4     | 14 | 20738777  | 20739572  | 84484  | 4.05E-07 | Solute carrier family 4 (anion exchanger)          |
| Gabra4     | 14 | 39047535  | 39048135  | 140675 | 5.17E-06 | Gamma-aminobutyric acid (GABA) A receptor          |
| Qdpr       | 14 | 70741467  | 70742543  | 64192  | 3.36E-07 | Quinoid dihydropteridine reductase                 |
| Selm       | 14 | 84159679  | 84160888  | 498398 | 4.82E-15 | Selenoprotein M                                    |
| Gatsl3     | 14 | 84841158  | 84842039  | 360969 | 1.75E-07 | GATS protein-like 3                                |
| Nefn       | 14 | 85605152  | 85605752  | 24587  | 1.35E-06 | Neurofilament                                      |
| Zrsr1      | 14 | 103656314 | 103656914 | 498425 | 3.86E-09 | Zinc finger (CCCH type)                            |
| Ndrp2      | 15 | 27346660  | 27347460  | 171114 | 1.88E-06 | N-myc downstream regulated gene 2                  |
| Map1s      | 16 | 19026425  | 19027110  | 290640 | 3.28E-06 | Microtubule-associated protein 1S                  |
| Tssk6      | 16 | 20011390  | 20011990  | 290670 | 1.86E-07 | Testis-specific serine kinase 6                    |
| Lpar2      | 16 | 20085235  | 20086235  | 498609 | 1.82E-08 | Lysophosphatidic acid receptor 2                   |

|            |    |          |          |        |          |                                                 |
|------------|----|----------|----------|--------|----------|-------------------------------------------------|
| Mtmr7      | 16 | 54982063 | 54982663 | 306490 | 3.05E-07 | Myotubularin related protein 7                  |
| Cldn23     | 16 | 60109078 | 60109863 | 290789 | 3.62E-06 | Claudin 23                                      |
| Plat       | 16 | 73735602 | 73736590 | 25692  | 4.95E-06 | Plasminogen activator                           |
| Higd2a     | 17 | 16084231 | 16084831 | 290999 | 8.04E-06 | HIG1 hypoxia inducible domain family            |
| Bicd2      | 17 | 21261287 | 21261965 | 306809 | 1.85E-06 | Bicaudal D homolog 2 (Drosophila)               |
| Edn1       | 17 | 28311655 | 28312632 | 24323  | 7.28E-07 | Endothelin 1                                    |
| Hist1h2bn  | 17 | 50352153 | 50352753 | 291157 | 8.37E-09 | Histone cluster 1                               |
| Snrpd1     | 18 | 2001020  | 2001620  | 291794 | 8.10E-16 | Small nuclear ribonucleoprotein D1              |
| Psd2       | 18 | 28595608 | 28596208 | 307500 | 6.56E-06 | Pleckstrin and Sec7 domain containing 2         |
| Zmat2      | 18 | 29493454 | 29494054 | 679898 | 7.74E-07 | Zinc finger                                     |
| Hdac3      | 18 | 30875398 | 30876374 | 84578  | 1.14E-06 | Histone deacetylase 3                           |
| Mc5r       | 18 | 64679777 | 64680673 | 25726  | 3.36E-08 | Melanocortin 5 receptor                         |
| Cklf       | 19 | 663953   | 664553   | 245978 | 1.15E-06 | Chemokine-like factor                           |
| Gpr56      | 19 | 10474868 | 10475468 | 260326 | 8.48E-06 | G protein-coupled receptor 56                   |
| Mt1a       | 19 | 11262202 | 11262802 | 24567  | 1.41E-07 | Metallothionein 1a                              |
| Mt2A       | 19 | 11268160 | 11268760 | 689415 | 5.00E-07 | Metallothionein 2A                              |
| Siah1a     | 19 | 21716960 | 21717780 | 140941 | 4.56E-07 | Seven in absentia 1A                            |
| Tppp3      | 19 | 35287184 | 35287884 | 291966 | 2.15E-06 | Tubulin polymerization-promoting protein family |
| Marveld3   | 19 | 39829993 | 39830671 | 498950 | 5.77E-06 | MARVEL domain containing 3                      |
| Plcg2      | 19 | 47611532 | 47612132 | 29337  | 3.49E-09 | Phospholipase C                                 |
| Tubb3      | 19 | 53742902 | 53743830 | 246118 | 4.83E-11 | Tubulin                                         |
| Ppp1r10    | 20 | 2984169  | 2984883  | 65045  | 6.21E-08 | Protein phosphatase 1                           |
| RT1-CE5    | 20 | 3513158  | 3513758  | 309607 | 6.05E-13 | RT1 class I                                     |
| RT1-CE4    | 20 | 3538680  | 3539280  | 414783 | 8.17E-07 | RT1 class I                                     |
| Agpat1     | 20 | 4246520  | 4248196  | 406165 | 3.69E-10 | 1-acylglycerol-3-phosphate O-acyltransferase 1  |
| Pbx2       | 20 | 4259521  | 4260219  | 406164 | 1.36E-09 | Pre-B-cell leukemia homeobox 2                  |
| Gpsm3      | 20 | 4264786  | 4265476  | 406163 | 1.28E-06 | G-protein signaling modulator 3 (AGS3-like)     |
| Psmb8      | 20 | 4789138  | 4790128  | 24968  | 2.68E-10 | Proteasome (prosome)                            |
| Vps52      | 20 | 5083014  | 5084511  | 25218  | 1.31E-09 | Vacuolar protein sorting 52 homolog             |
| Wdr46      | 20 | 5097321  | 5098324  | 309628 | 1.03E-06 | WD repeat domain 46                             |
| AA926063   | 20 | 5139498  | 5140393  | 294284 | 5.37E-14 | Aa926063gene                                    |
| Kifc1      | 20 | 5147332  | 5147932  | 294286 | 1.50E-08 | Kinesin family member C1                        |
| RGD1564450 | 20 | 5774457  | 5775360  | 294291 | 7.14E-06 | Rgd1564450                                      |
| Glp1r      | 20 | 9224920  | 9225807  | 25051  | 1.63E-06 | Glucagon-like peptide 1 receptor                |
| RGD1303003 | 20 | 10850846 | 10851446 | 294326 | 2.07E-06 | Homolog of zebrafish ES1                        |
| Derl3      | 20 | 13164828 | 13165506 | 690315 | 8.28E-06 | Der1-like domain family                         |
| RT1-CE16   | 20 | 39700    | 40300    | 414819 | 3.19E-06 | RT1 class I                                     |
| RT1-CE11   | 20 | 131360   | 131960   | 414791 | 3.76E-06 | RT1 class I                                     |
| Ptges3l1   | X  | 63914885 | 63915485 | 367808 | 1.12E-06 | Prostaglandin E synthase 3-like 1               |

Average found in F3-generation rat sperm after exposure of F0 generation to DDT, obtained averaging the results of three comparative hybridizations.
